# Supplementary material for: Complex Mixtures: Array PBPK Modeling of Jet Fuel Components
Source: MDPI journal article supplement (doi:10.3390/toxics11020187), 2023-02-17
Supplement: s1 [file s1]

Supplementary Materials S1:

# Complex Mixtures Array Model Code

Teresa R. Sterner <sup>1,2,\*</sup>, Tammie R. Covington <sup>1,2</sup> and David R. Mattie <sup>2</sup>

<sup>1</sup> Henry M. Jackson Foundation for the Advancement of Military Medicine; Wright-Patterson AFB, OH

<sup>2</sup> Air Force Research Laboratory, 711HPW/RHBAF; Wright-Patterson AFB, OH

\* Correspondence: tsterner@hjfresearch.org

## 1. acslX Array Model Code

The code pasted in sections below may have artificial breaks imposed by formatting; these additional line breaks and spaces may need to be removed for the .csl and .m files to run correctly.

## 2. Array Model .csl File

```
PROGRAM: JFHL_6HC_SA.CSL
! Jet fuel hearing loss model for 6 hydrocarbons -- version "SA" for sensitivity analysis

! Adapted from version of Isopropanol/Acetone model using arrays and from 4 Chem model

! Model currently set up to run for 6 chemicals
! Will run for fewer chemicals without modifications as long as parameters are set accordingly
! Can change the model to run for more or less by only changing the "6" in the line "PARAMETER (NChem=6)"

! ***** SET INIT.M TO LOAD AT RUN TIME *****

INITIAL
  INTEGER NChem
  PARAMETER (NChem=6)

  DIMENSION MW(NChem)
  DIMENSION PB(NChem), PBrnStm(NChem), PBrnTL(NChem), PBrn(NChem), PCoc(NChem), PFat(NChem), PLiv(NChem),
  PLng(NChem), PRap(NChem), PSlw(NChem)
  DIMENSION PABrnStm(NChem), PABrnTL(NChem), PABrn(NChem), PACoc(NChem), PAFat(NChem), PALiv(NChem),
  PALng(NChem), PARap(NChem), PASlw(NChem)
  DIMENSION VMaxC(NChem), KM(NChem), KFC(NChem), VMaxLngC(NChem), KMLng(NChem)
  DIMENSION ClUrC(NChem), Scrub(NChem)
  DIMENSION Conc(NChem), IVDose(NChem), PDose(NChem), PDrink(NChem)
  DIMENSION kAD(NChem), kAS(NChem), kTD(NChem), kTSD(NChem)
  DIMENSION AI0(NChem), IVR(NChem), Drink(NChem), TotDose(NChem)
  DIMENSION VMax(NChem), KF(NChem), VMaxLng(NChem)
  DIMENSION ClUr(NChem)
  DIMENSION IAArt(NChem), IABrnStm(NChem), IABrnStmBld(NChem), IABrnTL(NChem), IABrnTLBld(NChem),
  IABrn(NChem), IABrnBld(NChem)
  DIMENSION IACoC(NChem), IACoCBld(NChem), IAFat(NChem), IAFatBld(NChem), IALiv(NChem), IALivBld(NChem),
  IALng(NChem), IALngBld(NChem)
  DIMENSION IARap(NChem), IARapBld(NChem), IASlw(NChem), IASlwBld(NChem)
  DIMENSION IAExh(NChem), IAO(NChem), IAExc(NChem), IADu(NChem), IASl(NChem), IASlBld(NChem), IASlMet1(NChem), IASlMet2(NChem),
  IASlMetLng(NChem)
  DIMENSION IAUrn(NChem), IAUCCArt(NChem), IAUCCBrnStm(NChem), IAUCCBrn(NChem), IAUCCLiv(NChem),
  IATotInh(NChem), IATotIV(NChem), IATotDrink(NChem)
  DIMENSION PerEnd(NChem), PerMix(NChem)
  DIMENSION Calv(NChem), CalvPPM(NChem), CP(NChem), CEnd(NChem), CEndPPM(NChem), CMix(NChem), CMixPPM(NChem),
  CBrnTotBld(NChem), CBrnTot(NChem)
  DIMENSION ACh(NChem), CInh(NChem), RACH(NChem), AArt(NChem), AExh(NChem), CArt(NChem), AUCCArt(NChem)
  DIMENSION CVen(NChem), RAArt(NChem), RAExh(NChem)
  DIMENSION ABrnStm(NChem), ABrnStmBld(NChem), CBrnStm(NChem), AUCCBrnStm(NChem), CBrnStmBld(NChem),
  RABrnStm(NChem), RABrnStmBld(NChem)
  DIMENSION ABrnTL(NChem), ABrnTLBld(NChem), CBrnTL(NChem), CBrnTLBld(NChem), RABrnTL(NChem),
  RABrnTLBld(NChem)
  DIMENSION ABrn(NChem), ABrnBld(NChem), CBrn(NChem), AUCCBrn(NChem), CBrnBld(NChem), RABrn(NChem),
  RABrnBld(NChem)
  DIMENSION ACoc(NChem), ACocBld(NChem), CCoc(NChem), CCocBld(NChem), RACoc(NChem), RACocBld(NChem)
  DIMENSION AFat(NChem), AFatBld(NChem), CFat(NChem), CFatBld(NChem), RAFat(NChem), RAFatBld(NChem)
```

```

    DIMENSION AO(NChem), AExc(NChem), ADu(NChem), ASt(NChem), RAO(NChem), RAExc(NChem), RADu(NChem),
    RASSt(NChem)
    DIMENSION ALiv(NChem), ALivBld(NChem), AMet1(NChem), AMet2(NChem), CLiv(NChem), CLivBld(NChem),
    AUCCLiv(NChem), RAMet1(NChem), RAMet2(NChem), RALiv(NChem), RALivBld(NChem)
    DIMENSION ALng(NChem), ALngBld(NChem), AMetLng(NChem), CLng(NChem), CLngBld(NChem), RAMetLng(NChem),
    RALng(NChem), RALngBld(NChem)
    DIMENSION ARap(NChem), ARapBld(NChem), CRap(NChem), CRapBld(NChem), RARap(NChem), RARapBld(NChem)
    DIMENSION ASlw(NChem), ASlwBld(NChem), CSLw(NChem), CSLwBld(NChem), RASlw(NChem), RASlwBld(NChem)
    DIMENSION AUrn(NChem), RAUrn(NChem)
    DIMENSION ATotInh(NChem), ATotIV(NChem), ATotDrink(NChem), RATotInh(NChem), TDose(NChem), AmtBody(NChem),
    MassBal(NChem)

    INTEGER i, j1, j2, j3, i1, i2, i3, i4, i5, i6, i7, i8, i9, i10, i11, i12, i13, i14, i15, i16
    LOGICAL CC ! To control whether closed or open chamber
    LOGICAL AdjFlows ! NEEDED FOR SENSITIVITY ANALYSIS -- to control adjusting tissue blood
flows if fractions don't sum to one (will recalculate QC regardless)
    LOGICAL AdjVols ! NEEDED FOR SENSITIVITY ANALYSIS -- to control adjusting tissue vol-
umes if fractions don't sum to set body total

! ----- PHYSIOLOGICAL PARAMETERS -----
    CONSTANT BW = 0.25 ! Body weight (kg)
    CONSTANT QCC = 14.6 ! Cardiac output (L/hr/kg^0.75)
    CONSTANT QPC = 24.75 ! Total pulmonary ventilation rate (L/hr/kg^0.75)
    CONSTANT AdjFlows = .FALSE. ! Don't adjust tissue blood flows (but does still recalculate QC as
total of tissue flows)
    CONSTANT AdjVols = .FALSE. ! Don't adjust tissue blood volumes

! Blood Flows (fraction of cardiac output)
    CONSTANT QBrnStmC = 0.004 ! Brain stem
    CONSTANT QBrnTLC = 0.003 ! Temporal lobe of brain
    CONSTANT QBrnC = 0.013 ! Remainder of brain (0.02 - QBrnStmC - QBrnTLC)
    CONSTANT QCocC = 0.00004 ! Cochlea (pair)
    CONSTANT QFatC = 0.07 ! Fat
    CONSTANT QLivC = 0.183 ! Liver
    CONSTANT QLngC = 0.021 ! Lung (Brown et al., 1997)
    CONSTANT QRapC = 0.536 ! Rapidly perfused tissues (0.557 - QLngC)
    CONSTANT QSlwC = 0.17 ! Slowly perfused tissues (includes cochlea)

! Tissue Volumes (fraction of body weight)
! (VCocMC is based on data for rat cochlea pair mass (kg)
    CONSTANT VAlvC = 0.007 ! Alveolar blood
    CONSTANT VBrnStmC = 0.001 ! Brain stem
    CONSTANT VBrnTLC = 0.001 ! Temporal lobe of brain
    CONSTANT VBrnC = 0.004 ! Remainder of brain (0.006 - VBrnStmC - VBrnTLC)
    CONSTANT VCocMC = 0.00007 ! Cochlea (pair) -- THIS ISN'T FRACTIONAL -- is multiplied by
BW^0.2348
    CONSTANT VFatC = 0.10 ! Fat
    CONSTANT VLivC = 0.034 ! Liver
    CONSTANT VLngC = 0.005 ! Lung (Brown et al 1997)
    CONSTANT VRapC = 0.039 ! Rapidly perfused tissues (0.044 - VLngC)
    CONSTANT VSlwC = 0.65 ! Slowly perfused tissues (includes cochlea)
    CONSTANT VBodyC = 0.841 ! Sum of fractional volumes
    CONSTANT DS = 0.15 ! Dead space volume (fraction)

! Tissue Blood Volumes (fraction of tissue volume)
    CONSTANT VBrnStmBldC = 0.03 ! Brain stem
    CONSTANT VBrnTLBldC = 0.03 ! Temporal lobe of brain
    CONSTANT VBrnBldC = 0.03 ! Remainder of brain
    CONSTANT VCocBldC = 0.0183 ! Cochlea
    CONSTANT VFatBldC = 0.0154 ! Fat
    CONSTANT VLivBldC = 0.21 ! Liver
    CONSTANT VLngBldC = 0.36 ! Lung (Brown et al., 1997)
    CONSTANT VRapBldC = 0.2075 ! Rapidly perfused tissues
    CONSTANT VSlwBldC = 0.0333 ! Slowly perfused tissues

! Simulation Control Parameters (hrs)
    CONSTANT TStop = 24.0
    CINTERVAL CINT = 0.01

! ----- DOSING PARAMETERS -----
! Dose Timing Parameters
    CONSTANT DaysWk = 1.0 ! Number of exposure days per week (days)
    CONSTANT DoseInt = 1000.0 ! Interval to repeat dosing (hrs)

```

```

CONSTANT      TMax = 24.0          ! Maximum time for exposures (hrs)

! Inhalation Exposure Parameters
CONSTANT      Conc = NChem*0.0    ! Inhaled concentration (ppm)
CONSTANT      TChng = 0.0         ! Length of inhalation exposure (hrs)

! Closed Chamber Parameters
CONSTANT      CC = .FALSE.        ! Default to open chamber
CONSTANT      kLCC = 0.0          ! Chamber loss (/hr)
CONSTANT      Rats = 1.0          ! Number of animals in experiment
CONSTANT      VChC = 9.1          ! Volume of closed chamber (L)

! Intravenous Exposure Parameters
CONSTANT      IVDose = NChem*0.0   ! IV dose (mg/kg)
CONSTANT      TInf = 0.20         ! Length of IV injection (hrs)

! Oral Exposure Parameters
CONSTANT      kAD = NChem*0.0      ! Absorption from duodenum (/hr)
CONSTANT      kAS = NChem*0.0      ! Absorption from stomach (/hr)
CONSTANT      kTD = NChem*0.0      ! Excretion (/hr)
CONSTANT      kTSD = NChem*0.0     ! Transfer - stomach to duodenum (/hr)
CONSTANT      PDose = NChem*0.0    ! Oral dose (mg/kg)
CONSTANT      PDrink = NChem*0.0   ! Drinking water dose (mg/kg/day)

! ----- CHEMICAL SPECIFIC PARAMETERS -----
! Molecular Weights (mg/mmmole)
CONSTANT      MW = NChem*1.0

! Tissue/Blood Partition Coefficients (unitless)
CONSTANT      PB = NChem*1.0       ! Blood/air
CONSTANT      PBrnStm = NChem*1.0  ! Brain stem
CONSTANT      PBrnTL = NChem*1.0   ! Temporal lobe of brain
CONSTANT      PBrn = NChem*1.0     ! Remainder of brain
CONSTANT      PCoc = NChem*1.0     ! Cochlea
CONSTANT      PFat = NChem*1.0     ! Fat
CONSTANT      PLiv = NChem*1.0     ! Liver
CONSTANT      PLng = NChem*1.0     ! Lung
CONSTANT      PRap = NChem*1.0     ! Rapidly perfused tissues
CONSTANT      PSlw = NChem*1.0     ! Slowly perfused tissues

! Tissue Permeability Coefficients (L/hr) (for diffusion limitation)
CONSTANT      PABrnStm = NChem*1000.0 ! Brain stem
CONSTANT      PABrnTL = NChem*1000.0 ! Brain temporal lobe
CONSTANT      PABrn = NChem*1000.0   ! Brain remainder
CONSTANT      PACoc = NChem*1000.0   ! Cochlea
CONSTANT      PAFat = NChem*1000.0   ! Fat
CONSTANT      PALiv = NChem*1000.0   ! Liver
CONSTANT      PALng = NChem*1000.0   ! Lung
CONSTANT      PARap = NChem*1000.0   ! Rapidly perfused tissues
CONSTANT      PASlw = NChem*1000.0   ! Slowly perfused tissues

! Metabolism Parameters
CONSTANT      VMaxC = NChem*0.0      ! Michaelis-Menten maximum reaction rat for lung metabolism
(mg/hr/kg^0.75)
CONSTANT      KM = NChem*1.0         ! Michaelis-Menten affinity coefficient (mg/L)
CONSTANT      KFC = NChem*0.0        ! First order rate constant (/hr)
CONSTANT      VMaxLngC = NChem*0.0   ! Michaelis-Menten maximum reaction rat for lung metabolism
(mg/hr/kg^0.75)
CONSTANT      KMLng = NChem*1.0      ! Michaelis-Menten affinity coefficient (mg/L)

! Uptake and Clearance Parameters (L/hr/kg^0.75)
CONSTANT      ClUrC = NChem*0.0      ! Urinary clearance
CONSTANT      Scrub = NChem*0.0      ! Inhaled dose scrubbed (fraction) (not absorbed into blood)

! ----- PHYSIOLOGICAL PARAMETER SCALING -----
! Alveolar Ventilation Rate (L/hr)
QAlv = 0.67 * (QPC * (BW**0.75))

! Scaled Blood Flows (L/hr)
QAdjus = 1.0
IF (AdjFlows) QAdjus = QBrnStmC + QBrnTLC + QBrnC + QFatC + QLivC + QLngC + QRapC + QSlwC
QC = QCC * (BW**0.75)
QBrnStm = (QBrnStmC / QAdjus) * QC          ! Brain stem

```

```

QBrnTL = (QBrnTLC / QAdjus) * QC           ! Temporal lobe of brain
QBrn = (QBrnC / QAdjus) * QC               ! Remainder of brain
QCoc = (QCocC / QAdjus) * QC               ! Cochlea (pair)
QFat = (QFatC / QAdjus) * QC               ! Fat
QLiv = (QLivC / QAdjus) * QC               ! Liver
QLng = (QLngC / QAdjus) * QC               ! Lung
QRap = (QRapC / QAdjus) * QC               ! Rapidly perfused tissues
QSlw = ((QSlwC / QAdjus) * QC) - QCoc      ! Slowly perfused tissues
QC = QBrnStm + QBrnTL + QBrn + QCoc + QFat + QLiv + QLng + QRap + QSlw

! Tissue Volumes (L)
VAdjus = 1.0
VCocC = (VCocMC * (BW**0.2348)) / BW      ! Data based calculation of cochlea pair
mass (kg)

IF (AdjFlows) VAdjus = VBodyC / (VALvC + VBrnStmC + VBrnTLC + VBrnC + VFatC + VLivC + VLngC + VRapC +
VSlwC)
  VALv = (VALvC * VAdjus) * BW             ! Alveolar blood
  VBrnStm = ((VBrnStmC * VAdjus) * BW) * (1.0 - VBrnStmBldC) ! Brain stem
  VBrnTL = ((VBrnTLC * VAdjus) * BW) * (1.0 - VBrnTLBldC)   ! Temporal lobe of brain
  VBrn = ((VBrnC * VAdjus) * BW) * (1.0 - VBrnBldC)         ! Remainder of brain
  VCoc = ((VCocC * VAdjus) * BW) * (1.0 - VCocBldC)         ! Cochlea (pair)
  VFat = ((VFatC * VAdjus) * BW) * (1.0 - VFatBldC)         ! Fat
  VLiv = ((VLivC * VAdjus) * BW) * (1.0 - VLivBldC)         ! Liver
  VLng = ((VLngC * VAdjus) * BW) * (1.0 - VLngBldC)         ! Lung
  VRap = ((VRapC * VAdjus) * BW) * (1.0 - VRapBldC)         ! Rapidly perfused tissues
  VSlw = ((VSlwC - VCocC) * VAdjus) * BW) * (1.0 - VSlwBldC) ! Slowly perfused tissues

! Tissue Blood Volumes (L)
VBrnStmBld = ((VBrnStmC * VAdjus) * BW) * VBrnStmBldC      ! Brain stem
VBrnTLBld = ((VBrnTLC * VAdjus) * BW) * VBrnTLBldC         ! Temporal lobe of brain
VBrnBld = ((VBrnC * VAdjus) * BW) * VBrnBldC               ! Remainder of brain
VCocBld = ((VCocC * VAdjus) * BW) * VCocBldC               ! Cochlea (pair)
VFatBld = ((VFatC * VAdjus) * BW) * VFatBldC               ! Fat
VLivBld = ((VLivC * VAdjus) * BW) * VLivBldC               ! Liver
VLngBld = ((VLngC * VAdjus) * BW) * VLngBldC               ! Lung
VRapBld = ((VRapC * VAdjus) * BW) * VRapBldC               ! Rapidly perfused tissues
VSlwBld = ((VSlwC - VCocC) * VAdjus) * BW) * VSlwBldC      ! Slowly perfused tissues

! ----- DOSING PARAMETER SCALING -----
! Initialize Dosing Parameters
  DayExp = 1.0                                           ! Counter for number of days exposed (days)

! Set Chamber Volume and Loss for Open and Closed Chamber Exposures
IF (.NOT. CC) THEN
  VCh = 1.0e+20           ! Volume of closed chamber (L) (large chamber = open chamber)
  kLC = 0.0               ! Chamber loss (/hr)
ELSE
  VCh = VChC - (Rats * BW) ! Calculate net chamber volume (L)
  kLC = kLCC              ! Chamber loss (/hr)
ENDIF

DO 1010 i=1, NChem
! Inhalation Exposure Parameters
  AI0(i) = (Conc(i) * VCh * MW(i)) / 24450.0           ! Initial amount in chamber (mg)
  CIZone = 1.0                                         ! Switch to turn inhalation on and off
for repeated exposure (unitless)

! Intravenous Exposure Parameters
  IVR(i) = 0.0                                           ! Rate of intravenous dosing (mg/hr)

! Scaled and Initial Doses
  Drink(i) = (PDrink(i) * BW) / 24.0                   ! Drinking water dose (mg/hr)
  TotDose(i) = 0.0                                       ! Initial total oral dose (mg)
1010: CONTINUE

! ----- CHEMICAL SPECIFIC PARAMETER SCALING -----
DO 1020 i=1, NChem
! Scaled Metabolism Parameters
  VMax(i) = VMaxC(i) * (BW**0.75)

```

---

```

KF(i) = KFC(i) / (BW**0.25)
VMaxLng(i) = VMaxLngC(i) * (BW**0.75)

! Scaled Clearance Rates
ClUr(i) = ClUrC(i) * (BW**0.75)

! Initialize Initial Values for Integrating State Variables
IAArt(i) = 0.0
IABrnStm(i) = 0.0
IABrnStmBld(i) = 0.0
IABrnTL(i) = 0.0
IABrnTLBld(i) = 0.0
IABrn(i) = 0.0
IABrnBld(i) = 0.0
IACoc(i) = 0.0
IACocBld(i) = 0.0
IAFat(i) = 0.0
IAFatBld(i) = 0.0
IALiv(i) = 0.0
IALivBld(i) = 0.0
IALng(i) = 0.0
IALngBld(i) = 0.0
IARap(i) = 0.0
IARapBld(i) = 0.0
IASlw(i) = 0.0
IASlwBld(i) = 0.0

IAExh(i) = 0.0
IAO(i) = 0.0
IAExc(i) = 0.0
IADu(i) = 0.0
IASt(i) = 0.0
IAMet1(i) = 0.0
IAMet2(i) = 0.0
IAMetLng(i) = 0.0
IAUrn(i) = 0.0
IAUCCArt(i) = 0.0
IAUCCBrnStm(i) = 0.0
IAUCCBrn(i) = 0.0
IAUCCLiv(i) = 0.0
IATotInh(i) = 0.0
IATotIV(i) = 0.0
IATotDrink(i) = 0.0

! Initialize Starting Values
PerEnd(i) = 0.0
PerMix(i) = 0.0
1020: CONTINUE

END                                ! End of Initial

DYNAMIC
  ALGORITHM  IALG = 2                                ! Gear stiff method

DISCRETE DoseOn      ! Start dosing
  INTERVAL DoseInt = 24.0                                ! Interval to repeat dosing (hrs)
  SCHEDULE DoseOffIV .AT. T + TInf
  SCHEDULE DoseOffInh .AT. T + TChng

  IF ((T .LT. TMax) .AND. (DayExp .LE. DaysWk)) .OR. CC) THEN
    CIZone = 1.0
  ENDIF

  DayExp = DayExp + 1.0
  IF (DayExp .GT. 7.0) THEN
    DayExp = 0.5
  ENDIF

DO 2010 j1=1, NChem
  IF (T .LE. TInf) THEN
    IVR(j1) = (IVDose(j1) * BW) / TInf                ! Rate of intravenous dosing (mg/hr)
    TotDose(j1) = TotDose(j1) + (PDose(j1) * BW)
  ENDIF
2010: CONTINUE

```

END

```
DISCRETE DoseOffIV
DO 2020 j2=1, NChem
  IVR(j2) = 0.0
2020: CONTINUE
END
```

```
DISCRETE DoseOffInh
  IF (.NOT. CC) THEN
    CIZone = 0.0
  ENDIF
END
```

```
!----- Calculate Parameters Used for Plotting -----
  Hours = T
  Minutes = T * 60.0
  Days = T / 24.0
```

```
DO 2030 i1=1, NChem
! Concentration in Alveolar Air (mg/L and ppm)
  CALv(i1) = CArt(i1) / PB(i1)
  CALvPPM(i1) = (CArt(i1) / PB(i1)) * (24450.0 / MW(i1))
```

```
! Concentration in Inhaled Air (ppm)
  CP(i1) = (CInh(i1) * 24450.0) / MW(i1)
```

```
! Concentration in End-Exhaled Air (mg/L, ppm and percent)
  CEnd(i1) = RAEKh(i1) / QAlv
  CEndPPM(i1) = CEnd(i1) * (24450.0 / MW(i1))
  IF (Conc(i1) .GT. 0.0) THEN
    PerEnd(i1) = (CEnd(i1) / ((Conc(i1) * MW(i1)) / 24450.0)) * 100.0
  ENDIF
```

```
! Concentration in Mixed Exhaled Air (mg/L, ppm and percent)
  CMix(i1) = ((1.0 - DS) * CEnd(i1)) + (DS * CInh(i1))
  CMixPPM(i1) = CMix(i1) * (24450.0 / MW(i1))
  IF (Conc(i1) .GT. 0.0) THEN
    PerMix(i1) = (CMix(i1) / ((Conc(i1) * MW(i1)) / 24450.0)) * 100.0
  ENDIF
```

```
! Calculate Total Brain Tissue and Tissue Blood Concentrations (mg/kg)
  CBrnTot(i1) = (ABrnStm(i1) + ABrnTL(i1) + ABrn(i1)) / (VBrnStm + VBrnTL + VBrn)
  CBrnTotBld(i1) = (ABrnStmBld(i1) + ABrnTLBld(i1) + ABrnBld(i1)) / (VBrnStmBld + VBrnTLBld + VBrnBld)
2030: CONTINUE
```

DERIVATIVE

```
!-----
! Amount in Inhaled Air (mg)
  ACh = INTVC(RACh, AI0)

! Concentration in Inhaled Air (mg/L) and Rate of Change in Chamber Concentration (mg/hr)
  PROCEDURAL (CInh, RACh = QAlv, VCh, kLC, CIZone, CArt)
DO 3010 i2=1, NChem
  CInh(i2) = ((ACh(i2) / VCh) * (1.0 - Scrub(i2))) * CIZone
  RACh(i2) = (Rats * ((QAlv * ((CArt(i2) / PB(i2)) - CInh(i2)))) - (kLC * ACh(i2))
3010: CONTINUE
END
```

```
! Amount in Arterial Blood (mg)
  AArt = INTVC(RAArt, IAArt)
  AUCCArt = INTVC(CArt, IAUCCArt)
```

```
! Amount in Exhaled Air (mg)
```

```

    AExh = INTVC(RAExh, IAEExh)

    PROCEDURAL (CArt = VALV)
DO 3020 i3=1, NChem
    CArt(i3) = AArt(i3) / VALV          ! Concentration of in arterial blood (mg/L)
3020: CONTINUE
    END

    PROCEDURAL (CVen, RAArt, RAExh = QC, QAlv, QBrnStm, QBrnTL, QBrn, QCoc, QFat, QLiv, QLng, QRap, QSlw, CArt,
&
    & CBrnStmBld, CBrnTLBld, CBrnBld, CCocBld, CFatBld, CLivBld, CLngBld, CRapBld, CSlwBld, IVR,
CInh, RAUrn)
DO 3030 i4=1, NChem
! Concentration in Mixed Venous Blood (mg/L)
    CVen(i4) = (QBrnStm*CBrnStmBld(i4) + QBrnTL*CBrnTLBld(i4) + QBrn*CBrnBld(i4) + QCoc*CCocBld(i4) +
QFat*CFatBld(i4) + QLiv*CLivBld(i4) &
    & + QLng*CLngBld(i4) + QRap*CRapBld(i4) + QSlw*CSlwBld(i4) + IVR(i4)) / QC

! Rate of Change in Arterial Blood (mg/hr)
    RAArt(i4) = (QAlv * (CInh(i4) - (CArt(i4) / PB(i4)))) + (QC * (CVen(i4) - CArt(i4))) - RAUrn(i4)

! Rate of Change in Exhaled Air (mg/hr)
    RAExh(i4) = (QAlv * (CArt(i4) / PB(i4)))

3030: CONTINUE
    END

! Brain Stem Tissue and Tissue Blood
    ABrnStm = INTVC(RABrnStm, IABrnStm)          ! Amount in brain stem tissue (mg)
    ABrnStmBld = INTVC(RABrnStmBld, IABrnStmBld) ! Amount in brain stem blood (mg)
    AUCCBrnStm = INTVC(CBrnStm, IAUCCBrnStm)

    PROCEDURAL (CBrnStm, CBrnStmBld, RABrnStm, RABrnStmBld = QBrnStm, VBrnStm, VBrnStmBld, CArt)
DO 3040 i5=1, NChem
    CBrnStm(i5) = ABrnStm(i5) / VBrnStm
! Concentration in brain stem tissue (mg/L)
    CBrnStmBld(i5) = ABrnStmBld(i5) / VBrnStmBld
! Concentration in brain stem blood (mg/L)
    RABrnStm(i5) = PABrnStm(i5) * (CBrnStmBld(i5) - (CBrnStm(i5) / PBrnStm(i5)))
! Rate of change in brain stem tissue (mg/hr)
    RABrnStmBld(i5) = (QBrnStm * (CArt(i5) - CBrnStmBld(i5))) + (PABrnStm(i5) * ((CBrnStm(i5) / PBrnStm(i5))
- CBrnStmBld(i5))) ! Rate of change in brain stem blood (mg/hr)
3040: CONTINUE
    END

! Brain Temporal Lobe and Tissue Blood
    ABrnTL = INTVC(RABrnTL, IABrnTL)          ! Amount in brain temporal lobe
tissue (mg)
    ABrnTLBld = INTVC(RABrnTLBld, IABrnTLBld) ! Amount in brain temporal lobe
blood (mg)

    PROCEDURAL (CBrnTL, CBrnTLBld, RABrnTL, RABrnTLBld = QBrnTL, VBrnTL, VBrnTLBld, CArt)
DO 3050 i6=1, NChem
    CBrnTL(i6) = ABrnTL(i6) / VBrnTL
! Concentration in brain temporal lobe tissue (mg/L)
    CBrnTLBld(i6) = ABrnTLBld(i6) / VBrnTLBld
! Concentration in brain temporal lobe blood (mg/L)
    RABrnTL(i6) = PABrnTL(i6) * (CBrnTLBld(i6) - (CBrnTL(i6) / PBrnTL(i6)))
! Rate of change in brain tissue (mg/hr)
    RABrnTLBld(i6) = (QBrnTL * (CArt(i6) - CBrnTLBld(i6))) + (PABrnTL(i6) * ((CBrnTL(i6) / PBrnTL(i6)) -
CBrnTLBld(i6))) ! Rate of change in brain temporal lobe blood (mg/hr)
3050: CONTINUE
    END

! Remainder of Brain Tissue and Tissue Blood
    ABrn = INTVC(RABrn, IABrn)          ! Amount in remainder of brain tis-
sue (mg)
    ABrnBld = INTVC(RABrnBld, IABrnBld) ! Amount in remainder of brain
blood (mg)
    AUCCBrn = INTVC(CBrn, IAUCCBrn)          ! Area under the curve for the con-
centration in remainder of brain tissue (hr*mg/L)

```

```

PROCEDURAL (CBrn, CBrnBld, RABrn, RABrnBld = QBrn, VBrn, VBrnBld, CArt)
DO 3060 i7=1, NChem
  CBrn(i7) = ABrn(i7) / VBrn
! Concentration in brain remainder tissue (mg/L)
  CBrnBld(i7) = ABrnBld(i7) / VBrnBld
! Concentration in brain remainder blood (mg/L)
  RABrn(i7) = PABrn(i7) * (CBrnBld(i7) - (CBrn(i7) / PBrn(i7)))
! Rate of change in brain remainder tissue (mg/hr)
  RABrnBld(i7) = (QBrn * (CArt(i7) - CBrnBld(i7))) + (PABrn(i7) * ((CBrn(i7) / PBrn(i7)) - CBrnBld(i7)))
! Rate of change in brain remainder blood (mg/hr)
3060: CONTINUE
  END

! Cochlea Tissue and Tissue Blood
  ACoc = INTVC(RACoc, IACoc) ! Amount in cochlea tissue (mg)
  ACocBld = INTVC(RACocBld, IACocBld) ! Amount in cochlea blood (mg)

PROCEDURAL (CCoC, CCoCBld, RACoC, RACoCBld = QCoC, VCoC, VCoCBld, CArt)
DO 3070 i8=1, NChem
  CCoC(i8) = ACoc(i8) / VCoC
! Concentration in cochlea (mg/L)
  CCoCBld(i8) = ACocBld(i8) / VCoCBld
! Concentration in cochlea blood (mg/L)
  RACoC(i8) = PACoC(i8) * (CCoCBld(i8) - (CCoC(i8) / PCoC(i8)))
! Rate of change in cochlea (mg/hr)
  RACoCBld(i8) = (QCoC * (CArt(i8) - CCoCBld(i8))) + (PACoC(i8) * ((CCoC(i8) / PCoC(i8)) - CCoCBld(i8)))
! Rate of change in cochlea blood (mg/hr)
3070: CONTINUE
  END

! Fat Tissue and Tissue Blood
  AFat = INTVC(RAFat, IAFat) ! Amount in fat tissue (mg)
  AFatBld = INTVC(RAFatBld, IAFatBld) ! Amount in fat blood (mg)

PROCEDURAL (CFat, CFatBld, RAFat, RAFatBld = QFat, VFat, VFatBld, CArt)
DO 3080 i9=1, NChem
  CFat(i9) = AFat(i9) / VFat
! Concentration in fat tissue (mg/L)
  CFatBld(i9) = AFatBld(i9) / VFatBld
! Concentration in fat blood (mg/L)
  RAFat(i9) = PAFat(i9) * (CFatBld(i9) - (CFat(i9) / PFat(i9)))
! Rate of change in fat tissue (mg/hr)
  RAFatBld(i9) = (QFat * (CArt(i9) - CFatBld(i9))) + (PAFat(i9) * ((CFat(i9) / PFat(i9)) - CFatBld(i9)))
! Rate of change in fat blood (mg/hr)
3080: CONTINUE
  END

! Digestive Tract
! Amount Absorbed (mg)
  AO = INTVC(RAO, IAO)

! Amount Excreted (mg)
  AExc = INTVC(RAExc, IAEExc)

! Amount Duodenum (mg)
  ADu = INTVC(RADu, IADu)

! Amount Leaving the Stomach (mg)
! (ASt changed to (INTVC(RASt, IAST)) and is replaced in other equations with (TotDose(i) - ASt(i)) since
ASt
! could not be defined as (TotDose - INTVC(RASt, 0.0)))
  ASt = INTVC(RASt, IAST)

! Rate of Change in Amount Absorbed, Amount Excreted, Amount in Duodenum and Amount Leaving Stomach (mg/hr)
PROCEDURAL (RAO, RAExc, RADu, RAST = TotDose)
DO 3090 i10=1, NChem
  RAO(i10) = (kAS(i10) * (TotDose(i10) - ASt(i10))) + (kAD(i10) * ADu(i10))
  RAExc(i10) = kTD(i10) * ADu(i10)
  RADu(i10) = (kTSD(i10) * (TotDose(i10) - ASt(i10))) - (kAD(i10) * ADu(i10)) - (kTD(i10) * ADu(i10))
  RAST(i10) = (kAS(i10) * (TotDose(i10) - ASt(i10))) + (kTSD(i10) * (TotDose(i10) - ASt(i10)))
3090: CONTINUE
  END

```



```

! Liver Tissue and Tissue Blood
  ALiv = INTVC(RALiv, IALiv) ! Amount in liver tissue (mg)
  ALivBld = INTVC(RALivBld, IALivBld) ! Amount in liver blood (mg)
  AUCCLiv = INTVC(CLiv, IAUCCLiv)

! Amount Metabolized in Liver -- Saturable (mg) and 1st Order (mg)
  AMet1 = INTVC(RAMet1, IAMet1) ! Amount metabolized, saturable
(mg)
  AMet2 = INTVC(RAMet2, IAMet2) ! Amount metabolized, first order
(mg)

  PROCEDURAL (CLiv, CLivBld, RALiv, RALivBld, RAMet1, RAMet2 = QLiv, Vliv, VlivBld, VMax, KF, CArt, RAO,
Drink)
DO 3100 i11=1, NChem
  CLiv(i11) = ALiv(i11) / Vliv
! Concentration in liver tissue (mg/L)
  CLivBld(i11) = ALivBld(i11) / VlivBld
! Concentration in liver blood (mg/L)
  RAMet1(i11) = (VMax(i11) * (CLiv(i11) / PLiv(i11))) / (KM(i11) + (CLiv(i11) / PLiv(i11)))
! Saturable rate of metabolism in liver (mg/hr)
  RAMet2(i11) = KF(i11) * (CLiv(i11) / PLiv(i11)) * Vliv
! First-order rate of metabolism in liver (mg/hr)
  RALiv(i11) = (PALiv(i11) * (CLivBld(i11) - (CLiv(i11) / PLiv(i11)))) - RAMet1(i11) - RAMet2(i11) +
RAO(i11) + Drink(i11) ! Rate of change in liver tissue (mg/hr)
  RALivBld(i11) = (QLiv * (CArt(i11) - CLivBld(i11))) + (PALiv(i11) * ((CLiv(i11) / PLiv(i11)) -
CLivBld(i11))) ! Rate of change in liver blood (mg/hr)
3100: CONTINUE
  END

! Lung Tissue and Tissue Blood
  ALng = INTVC(RALng, IALng) ! Amount in lung tissue (mg)
  ALngBld = INTVC(RALngBld, IALngBld) ! Amount in lung blood (mg)

! Amount Metabolized in Lung (mg)
  AMetLng = INTVC(RAMetLng, IAMetLng) ! Amount metabolized (mg)

  PROCEDURAL (CLng, CLngBld, RALng, RALngBld, RAMetLng = QLng, VLng, VLngBld, VMaxLng, CArt)
DO 3110 i12=1, NChem
  CLng(i12) = ALng(i12) / VLng
! Concentration in lung tissue (mg/L)
  CLngBld(i12) = ALngBld(i12) / VLngBld
! Concentration in lung blood (mg/L)
  RAMetLng(i12) = (VMaxLng(i12) * (CLng(i12) / PLng(i12))) / (KMLng(i12) + (CLng(i12) / PLng(i12)))
! Saturable rate of metabolism in lung (mg/hr)
  RALng(i12) = (PALng(i12) * (CLngBld(i12) - (CLng(i12) / PLng(i12)))) - RAMetLng(i12)
! Rate of change in lung tissue (mg/hr)
  RALngBld(i12) = (QLng * (CArt(i12) - CLngBld(i12))) + (PALng(i12) * ((CLng(i12) / PLng(i12)) -
CLngBld(i12))) ! Rate of change in lung blood (mg/hr)
3110: CONTINUE
  END

! Rapidly Perfused Tissue and Tissue Blood
  ARap = INTVC(RARap, IARap) ! Amount in rapidly perfused tissue
(mg)
  ARapBld = INTVC(RARapBld, IARapBld) ! Amount in rapidly perfused tissue
blood (mg)

  PROCEDURAL (CRap, CRapBld, RARap, RARapBld = QRap, VRap, VRapBld, CArt)
DO 3120 i13=1, NChem
  CRap(i13) = ARap(i13) / VRap
! Concentration in rapidly perfused tissue (mg/L)
  CRapBld(i13) = ARapBld(i13) / VRapBld
! Concentration in rapidly perfused tissue blood (mg/L)
  RARap(i13) = PARap(i13) * (CRapBld(i13) - (CRap(i13) / PRap(i13)))
! Rate of change in rapidly perfused tissue (mg/hr)
  RARapBld(i13) = (QRap * (CArt(i13) - CRapBld(i13))) + (PARap(i13) * ((CRap(i13) / PRap(i13)) - CRap-
Bld(i13))) ! Rate of change in rapidly perfused tissue blood (mg/hr)
3120: CONTINUE
  END

! Slowly Perfused Tissue and Tissue Blood

```

```

      ASlw = INTVC(RASlw, IASlw)                                ! Amount in slowly perfused tissue
(mg)
      ASlwBld = INTVC(RASlwBld, IASlwBld)                      ! Amount in slowly perfused tissue
blood (mg)

      PROCEDURAL (CSlw, CSlwBld, RASlw, RASlwBld = QSlw, VSlw, VSlwBld, CArt)
DO 3130 i14=1, NChem
      CSlw(i14) = ASlw(i14) / VSlw
! Concentration in slowly perfused tissue (mg/L)
      CSlwBld(i14) = ASlwBld(i14) / VSlwBld
! Concentration in slowly perfused tissue blood (mg/L)
      RASlw(i14) = PASlw(i14) * (CSlwBld(i14) - (CSlw(i14) / PSlw(i14)))
! Rate of change in slowly perfused tissue (mg/hr)
      RASlwBld(i14) = (QSlw * (CArt(i14) - CSlwBld(i14))) + (PASlw(i14) * ((CSlw(i14) / PSlw(i14)) -
CSlwBld(i14)))          ! Rate of change in slowly perfused tissue blood (mg/hr)
3130: CONTINUE
      END

! Amount in Urine (mg)
      AUrn = INTVC(RAUrn, IAUrn)

! Rate of Excretion (mg/hr)
      PROCEDURAL (RAUrn = ClUr, CArt)
DO 3140 i15=1, NChem
      RAUrn(i15) = ClUr(i15) * CArt(i15)
3140: CONTINUE
      END

!----- CHECK MASS BALANCE -----
! Total Amount Inhaled (mg)
      ATotInh = INTVC(RATotInh, IATotInh)

! Total Amount Injected (mg)
      ATotIV = INTVC(IVR, IATotIV)

! Total Amount Drunk (mg)
      ATotDrink = INTVC(Drink, IATotDrink)

! Calculating Total Brain Concentration (mg/kg), Total Dose (mg), Total Amount in Body (mg) and Mass Balance
(mg)
      PROCEDURAL (RATotInh, TDose, AmtBody, MassBal = QAlv, TotDose, CInh)
DO 3150 i16=1, NChem
      RATotInh(i16) = QAlv * CInh(i16)
      TDose(i16) = ATotInh(i16) + ATotIV(i16) + TotDose(i16) + ATotDrink(i16)
      AmtBody(i16) = AArt(i16) + ABrnStm(i16) + ABrnStmBld(i16) + ABrnTL(i16) + ABrnTLBld(i16) + ABrn(i16) +
ABrnBld(i16) &
      & + ACoc(i16) + ACocBld(i16) + AFat(i16) + AFatBld(i16) + ALiv(i16) + ALivBld(i16) +
ALng(i16) + ALngBld(i16) &
      & + ARap(i16) + ARapBld(i16) + ASlw(i16) + ASlwBld(i16) + AExh(i16) + AUrn(i16) + AMet1(i16)
+ AMet2(i16) &
      & + AMetLng(i16) + AExc(i16) + ADu(i16) + ASt(i16)
      MassBal(i16) = TDose(i16) - AmtBody(i16)
3150: CONTINUE
      END

TERMT(T.GT.TStop, 'Simulation Finished')

END                ! End of Derivative
END                ! End of Dynamic
END                ! End of Program

```

### 3. Utility .m Files

#### init.m

This file should be set to execute at load-time.

```

prepare T HOURS MINUTES DAYS CART AUCCART CBRNSTM CBRNSTMBLD AUCCBRNSTM CBRNTL CBRNTLBLD
prepare CBRN CBRNBLD AUCCBRN CBRNTOT CBRNTOTBLD CCOC CCOCBLD CFAT CFATBLD CLIV AUCCCLIV CLIVBLD
prepare CLNG CLNGBLD CRAP CRAPBLD CSLW CSLWBLD CVEN AEXH CINH CEND AURN TDOSE AMTBODY MASSBAL

```

```
HVDPRN=0;
WESITG=0;
WEDITG=0;
```

## ResetDoses.m

```
ADJFLOWS=1; ADJVOLS=1;

for iter = [1 : 6]
    CONC(iter)=0.0;
    IVDOSE(iter)=0.0;
    PDOSE(iter)=0.0;
    PDRINK(iter)=0.0;
end

TCHNG=0.0; DAYSWK=1.0; TMAX=24.0; DOSEINT=1000.0;
TINF=0.2;
RATS=1.0;
CC=0; VCHC=9.1; KLCC=0.0;
CINT=0.01;
```

## Rattus.m

```
% Generic rat parameters

% REF1 -- Clewell HJ, III, Gentry PR, Gearhart JM, Covington TR, Banton MI, Andersen ME: Development of a
physiologically
% based pharmacokinetic model of isopropanol and its metabolite acetone. Toxicol Sci 2001, 63(2):160-172.
% REF2 -- Gjedde et al 1980 Rapid simultan determinat of regional blood flow_blood-brain glucose transfer in
brain of rats
% REF3 -- Robinson et al. 2013 TR
% REF4 -- Sterner et al. 2014 TMB-4 model
% REF5 -- Delp et al. 1991
% REF6 -- AALAS Learning Library, 2005
% REF7 -- Morizuno et al 1968 Cochlear blood vol in Gpig measured w Cr51 label RBC (Hearing Loss reference
file)
% REF8 -- Merrill et al 2008 Improved predictive model 4 decane kinetics across species.pdf
% REF9 -- Robinson and Merrill 2008 Harmonized PBPK mdl 4 nonane as component of jet fuel.pdf
% REF10 -- Brown et al. 1997

% All cochlea parameters are for paired cochlea.

% Values from REF1, unless otherwise stated
BW=0.25; % 0.25 from EPA, REF1 = 0.22, REF8&9 = 0.3
QCC=14.6;
QPC=24.75;

QBRNSTMC=0.004;
QBRNTLC=0.003; % Calculated using brain volumes & REF2
QBRNC=0.013; % Remainder only; Adds up to 0.02 (REF10)
QCOCC=0.00004; % REF3
QFATC=0.07;
QLIVC=0.183;
QLNGC=0.021;
QRAPC=0.536; % 0.557-Lung
QSLWC=0.17; % Includes cochlea

VALVC=0.007;
VBRNSTMC=0.001; % REF5 Table 3
VBRNTLC=0.001; % in-house research
VBRNC=0.004; % Remainder only; 0.006 - VBRNSTMC - VBRNTLC; 0.006 from REF5 Table 3 (0.0057 in
REF10)
VCOCMC=0.00007; % Cochlea (pair) -- THIS ISN'T FRACTIONAL -- is multiplied by BW^0.2348 in model code
VFATC=0.10; % 0.0625 in REF10
VLIVC=0.034; % 0.0366 in REF10
VLNGC=0.005; % REF10
VRAPC=0.039; % 0.044-Lung
VSLWC=0.65;
VBODYC=0.841;
```

```
DS=0.15; % Per REF1: acetone = 0.25, isopropanol = 0.15, typical lipophilics = 0.3, csl de-
fault=0.15
```

```
% Blood content values for most tissues from REF5
VBRNSTMBLDC=0.03; % Assumed same across the brain
VBRNTLBLDC=0.03;
VBRNBLDC=0.03; % REF4 and REF10
VCOCBLDC=0.0183; % Calculated from data in REF7
VFATBLDC=0.0154; % Not sure of source but close enough to REF10 (0.02)
VLIVBLDC=0.21; % REF4, REF10
VLNGBLDC=0.36; % REF10
VRAPBLDC=0.2075;
VSLWBLDC=0.0333;
```

## Rat\_6HCs.m

```
% Sets parameters for rat for all 6 hydrocarbons (HCs)
```

```
% Chemical 1 = Toluene
% Chemical 2 = Ethylbenzene
% Chemical 3 = Xylenes
% Chemical 4 = Nonane
% Chemical 5 = Decane
% Chemical 6 = Naphthalene
```

```
% REF1 -- Haddad et al 1999 Physiological modeling of the toxicokinetic interactions in a quaternary mixture
of aromatic
% hydrocarbons. Toxicol Appl Physiol. 161:249-57.
% REF2 -- Sterner et al 2004 AFRL-HE-WP-TR-2004-0032 Analysis of algorithms predicting blood-air_tissue-blood
PCs fr solvent PCs.pdf
% REF3 -- Schlosser PM, Asgharian BA, Medinsky M. 2010 Chapter 1.04 Inhalation Exposure and Absorption of
Toxicants.
% In: McQueen CA (ed). Comprehensive Toxicology. Volume 14. Elsevier e-book
% REF4 -- Hack Toluene model, Rat_Toluene.M
% REF5 -- Clewell HJ, III, Gentry PR, Gearhart JM, Covington TR, Banton MI, Andersen ME: Development of a
physiologically
% based pharmacokinetic model of isopropanol and its metabolite acetone. Toxicol Sci 2001, 63(2):160-172.
% REF6 -- Robinson, P.J. and Merrill, E.A. 2008. A harmonized physiologically based pharmacokinetic model for
nonane as a
% AFRL-RH-WP-TR-2008-0067, ADA502610.
% REF7 -- Sterner et al 2006 Analysis of algorithms...
% REF8 -- Joshi et al. 2010 PCs 4 nonane_isomers in rat.pdf
% REF9 -- Robinson and Merrill 2008 Harmonized PBPK mdl 4 nonane as component of jet fuel.pdf
% REF10 -- Merrill et al 2008 Improved predictive model 4 decane kinetics across species.pdf
% REF11 -- Buckpitt A, Morin D, Murphy S, Edwards P, Van Winkle L. Kinetics of naphthalene metabolism in tar-
get
% and non-target tissues of rodents and in nasal and airway microsomes from the Rhesus monkey. Toxicol
Appl
% Pharmacol. 2013 Jul 15;270(2):97-105.
% REF12 -- Campbell JL, Andersen ME, Clewell HJ. A hybrid CFD-PBPK model for naphthalene in rat and human
with
% IVIVE for nasal tissue metabolism and cross-species dosimetry. Inhal Toxicol. 2014 May;26(6):333-44.
% REF13 -- Cho TM, Rose RL, Hodgson E. In vitro metabolism of naphthalene by human liver microsomal cyto-
chrome
% P450 enzymes. Drug Metab Dispos. 2006 Jan;34(1):176-83.
% REF14 -- NIST Chemistry Webbook (https://webbook.nist.gov/cgi/cbook.cgi?Name=naphthalene&Units=SI)
% REF15 -- Schwarz FP, Wasik SP. 1977. A fluorescence method for the measurement of the partition coeffi-
cients of
% naphthalene, 1-methylnaphthalene, and 1-ethylnaphthalene in water. J. Chem. Eng. Data 22(3):270-273.
% REF16 -- Ruark CD, Hack CE, Robinson PJ, Mahle DA, Gearhart JM. Predicting passive and active tissue:plasma
partition
% coefficients: interindividual and interspecies variability. J Pharm Sci. 2014 Jul;103(7):2189-2198.
% REF17 -- Sterner 2017 Technical report on JFHL
```

```
MWList=[92.14 106.17 106.17 128.0 142.3 128.1705];
PBLList=[18.0 42.7 46.0 5.2 5.0 571.0];
PBrnStmList=[2.87 1.93 2.29 0.0 0.0 3.5];
PBrnTLList=[2.13 1.44 1.61 0.0 0.0 3.5];
PBrnList=[2.0 1.22 1.38 5.0 10.0 3.5];
PCoCList=[0.54 0.44 0.47 1.45 2.15 0.47];
PFatList=[56.7 36.4 40.4 282.0 328.0 49.0];
PLivList=[4.64 1.96 1.98 8.0 3.0 1.6];
PLngList=[4.64 1.41 1.98 2.0 3.0 3.5];
PRapList=[4.64 1.41 1.98 2.0 3.0 3.5];
```

---

```

PSlwList=[1.54 0.61 0.91 4.0 0.85 3.5];
VMaxCList=[3.44 6.39 6.49 0.1 0.005 -1.0];
KMList=[0.13 1.04 0.45 0.1 0.1 2.18];
ClUrCList=[0.004 0.04 0.004 0.4 0.004 0.0];

for iter = [1 : 6]
    MW(iter) = MWList(iter);

    PB(iter) = PBList(iter);
    PBRNSTM(iter) = PBrnStmList(iter);
    PBRNTL(iter) = PBrnTLList(iter);
    PBRN(iter) = PBrnList(iter);
    PCOC(iter) = PCoCList(iter);
    PFAT(iter) = PFatList(iter);
    PLIV(iter) = PLivList(iter);
    PLNG(iter) = PLngList(iter);
    PRAP(iter) = PRapList(iter);
    PSLW(iter) = PSlwList(iter);

% If PA = 10000.0, essentially equivalent to flow limited
    PABRNSTM(iter) = 10000.0;
    PABRNTL(iter) = 10000.0;
    PABRN(iter) = 10000.0;
    PACOC(iter) = 10000.0;
    PAFAT(iter) = 10000.0;
    PALIV(iter) = 10000.0;
    PALNG(iter) = 10000.0;
    PARAP(iter) = 10000.0;
    PASLW(iter) = 10000.0;

    VMAXC(iter) = VMaxCList(iter);
    KFC(iter) = 0.0; % Not expecting first order metabolism for these compounds
    KM(iter) = KMList(iter);
    VMAXLNGC(iter) = 0.0; % Assumed all metabolism in liver except for Naphthalene (VMAXLNGC in
NaDORT model was not allometrically scaled -- REF11, added 2 enzyme values)
    KMLNG(iter) = 1.0; % KMLNG values don't matter when VMAXLNGC values were zero so set to
1.0 to avoid division by zero

    CLURC(iter) = ClUrCList(iter);
    SCRUB(iter) = 0.0; % Fraction of concentration in air that is scrubbed out (not ab-
sorbed), 0=no scrubbing

    KAD(iter) = 0.0;
    KAS(iter) = 0.0;
    KTD(iter) = 0.0;
    KTSd(iter) = 0.0;
end

PBRNSTM(4) = (2.9/1.7)*PBRN(4);
PBRNSTM(5) = (1.56/1.75)*PBRN(5);
PBRNTL(4) = (2.6/1.7)*PBRN(4);
PBRNTL(5) = (1.16/1.75)*PBRN(5);

% If PA = 10000.0, essentially equivalent to flow limited
PABRNSTM(4)=0.5; PABRNSTM(5)=0.005;
PABRNTL(4)=0.5; PABRNTL(5)=0.005;
PABRN(4)=0.5; PABRN(5)=0.005;
PACOC(4)=1.0; PACOC(5)=1.0;
PAFAT(4)=0.5; PAFAT(5)=0.07; PAFAT(6)=0.2*(BW^0.75);
PALIV(4)=0.07; PALIV(5)=0.15;
PALNG(4)=1.0; PALNG(5)=0.005;
PARAP(4)=1.0; PARAP(5)=0.005;
PASLW(4)=0.5; PASLW(5)=0.14; PASLW(6) = 2.0*(BW^0.75);

% Assumed all metabolism in liver except for Naphthalene (VMAXLNGC in NaDORT model was not allometrically
scaled -- REF11, added 2 enzyme values)
VMAXC(6) = (8.28*BW)/(BW^0.75);
VMAXLNGC(6) = (0.45*BW)/(BW^0.75);

% KMLNG values don't matter when VMAXLNGC values were zero so set to 1.0 to avoid division by zero
KMLNG(6) = 2.18;

```

```
% Fraction of concentration in air that is scrubbed out (not absorbed), 0=no scrubbing
SCRUB(4)=0.4; SCRUB(5)=0.7;
```

#### 4. Validation Figures .m Files

These .m files were used to produce Figures 2-4 in the main article and all figures in Appendix A.

##### C1\_Lam.m

```
% Lam, C.W., Galen, T.J., Boyd, J.F. and Pierson, D.L. 1990. Mechanism of transport and distribution
%   of organic solvents in blood. Toxicol.Appl.Pharmacol. 104(1): 117-129.

% Male Sprague-Dawley rats, BW about 300 g.
% 2-hour whole-body inhalation of 488 +/- 24 ppm toluene.
% n = 5 rats, put in 10 minutes apart.
% 30 L closed chamber with 5 rats, but CONC is maintained at 488 ppm, rather than depleted, so run as open
chamber.
% Data from Plasma+RBC column, Table 1, page 121

% T (hr), CVEN (mg/L)
Lam = [
    2.0    10.90
    2.0    15.03
    2.0    14.98
    2.0    15.02
    2.0    15.09];

ResetDoses
Rattus
Rat_6HCs

% Study specific values as found in Hack toluene model, Lam.M
BW=0.3; CONC(1)=488.0; TCHNG=2.0; TSTOP=4.0;
% VMAXC(1)=3.44; KM(1)=0.13;
start @nocallback
plotcven = plot (0, Lam(:,1), Lam(:,2), '+b', _t, _cven(:,1), '-b');

set @preference=BackslashEscapes
pltscript(plotcven, "Chart.Header.Text = \"Lam et al. (1990) Toluene Inhalation Study\";")
pltscript(plotcven, "Chart.SubHeader.Text = \"488 ppm Inhalation for 2 Hours\";")
pltscript(plotcven, "Chart.SubHeader.Visible=true;")
pltscript(plotcven, "Chart.Axes.Left.Title.Text=\"Toluene in Venous Blood [mg/L]\";")
pltscript(plotcven, "Chart.Axes.Bottom.Title.Text=\"Hours\";")
pltscript(plotcven, "Chart.Series[0].Title=\"488 ppm\";")
pltscript(plotcven, "Chart.Series[1].Title=\"Simulation 488 ppm\";")
set @preference=NoBackslashEscapes
```

##### C1\_Romer.m

```
% Romer, K.G., Federsel, R.J. and Freundt, K.J. 1986. Rise of inhaled toluene, ethyl benzene,
%   m-xylene, or mesitylene in rat blood after treatment with ethanol. Bull Environ Contam
%   Toxicol 37(6): 874-876.

% Adult female SPF Sprague-Dawley rats (200 - 220 g BW)
% Groups of 3 rats exposed in a 20 L glass chamber, air flow 1.25 L/min, for 2 hr. 20 L closed chamber with
3 rats,
%   but CONC is maintained at 220 ppm, rather than depleted, so run as open chamber.
% Aromatic conc varied < 5%, delivered via evaporator. Sham-treated groups given 5 mL/kg physiological sa-
line.
% Exposure conc monitored via GC using 100 uL air samples.
% Blood (0.02 mL) collected from retro-orbital plexus. Blood conc of aromatics determined by GC.

% Table 1
% meanblood = (56.8e-6 * 92.14 * 1000)=5.23, mol/L conversion to mg/L, MW=92.14
% semblood = (2.1e-6*92.14*1000)=0.19, mol/L conversion to mg/L, MW=92.14
% sem range = 5.04 - 5.43
```

```
% T(hr), CVEN(mg/L)
Romer = [
    2.0    5.23
    2.0    5.04
    2.0    5.43];

ResetDoses
Rattus
Rat_6HCs

BW=0.210; CONC(1)=220.0; TCHNG=2.0; TSTOP=3.0;
% VMAXC(1)=3.44; KM(1)=0.13;
start @nocallback
plotcven = plot (0, Romer(:,1), Romer(:,2), '+b', _t, _cven(:,1), '-b');

set @preference=BackslashEscapes
    pltscript(plotcven, "Chart.Header.Text = \"Romer et al. (1986) Toluene Inhalation Study\";")
    pltscript(plotcven, "Chart.SubHeader.Text = \"220 ppm Inhalation for 2 Hours\";")
    pltscript(plotcven, "Chart.SubHeader.Visible=true;")
    pltscript(plotcven, "Chart.Axes.Left.Title.Text=\"Toluene in Venous Blood [mg/L]\";")
    pltscript(plotcven, "Chart.Axes.Bottom.Title.Text=\"Hours\";")
    pltscript(plotcven, "Chart.Series[0].Title=\"220 ppm mean value\";")
    pltscript(plotcven, "Chart.Series[1].Title=\"Simulation 220 ppm\";")
set @preference=NoBackslashEscapes
```

### C1to3\_Haddad.m

```
% Combines C1_Haddad.m, C2_Haddad.m and C3_Haddad.m

% Haddad, S., Tardif, R., Charest-Tardif, G. and Krishnan, K. 1999. Physiological modeling
%   of the toxicokinetic interactions in a quaternary mixture of aromatic hydrocarbons.
%   Toxicol.Appl.Pharmacol. 161(3): 249-257.
```

```
% T, CVEN
Had50Toluene = [
    4.0    0.472
    4.0    0.546
    4.5    0.210
    4.5    0.281
    4.5    0.354
    5.0    0.093
    5.0    0.136
    5.0    0.182
    5.5    0.083
    5.5    0.133
    5.5    0.108
    6.0    0.045
    6.0    0.059
    6.0    0.072];
```

```
% T, CVEN (mean, +SD, -SD)
Had50Ethylben = [
    4.1    0.66
    4.5    0.46
    5.0    0.28
    5.5    0.17
    6.0    0.13
    4.1    0.78
    4.5    0.53
    5.0    0.32
    5.5    0.20
    6.0    0.17
    4.1    0.59
    4.5    0.33
    5.0    0.22
    5.5    0.15
    6.0    0.09];
```

```
% T, CVEN (mean, +SD, -SD)
Had50Xylene = [
```

---

```
4.1 0.49
4.5 0.32
5.0 0.24
5.5 0.17
6.0 0.12
4.1 0.55
4.5 0.40
5.0 0.29
5.5 0.21
6.0 0.15
4.1 0.43
4.5 0.23
5.0 0.20
5.5 0.14
6.0 0.09];
```

```
% T, CVEN
Had100Toluene = [
4.0 0.751
4.0 1.033
4.0 1.464
4.5 0.547
4.5 0.632
4.5 0.798
5.0 0.281
5.0 0.345
5.0 0.435
5.5 0.199
5.5 0.290
5.5 0.230
6.0 0.112
6.0 0.133
6.0 0.173];
```

```
% T, CVEN
Had100Ethylben = [
4.1 1.52
4.5 1.02
5.0 0.70
5.5 0.45
6.0 0.31
4.1 1.68
4.5 1.15
5.0 0.89
5.5 0.58
6.0 0.36
4.1 1.36
4.5 0.94
5.0 0.57
5.5 0.38
6.0 0.28];
```

```
% T, CVEN
Had100Xylene = [
4.1 1.20
4.5 0.86
5.0 0.50
5.5 0.37
6.0 0.24
4.1 1.46
4.5 1.02
5.0 0.62
5.5 0.45
6.0 0.33
4.1 1.10
4.5 0.73
5.0 0.44
5.5 0.33
6.0 0.17];
```

```
% T, CVEN
Had200Toluene = [
```



---

```

4.0    3.205
4.0    4.042
4.0    5.099
4.5    2.334
4.5    3.120
4.5    3.714
5.0    1.559
5.0    1.856
5.0    2.274
5.5    0.826
5.5    1.352
5.5    1.072
6.0    0.602
6.0    0.716
6.0    0.804];

% T, CVEN
Had200Ethylben = [
4.1    5.73
4.5    3.79
5.0    2.70
5.5    1.92
6.0    1.36
4.1    6.57
4.5    4.24
5.0    3.02
5.5    2.21
6.0    1.66
4.1    5.05
4.5    3.42
5.0    2.44
5.5    1.72
6.0    1.12];

% T, CVEN
Had200Xylene = [
4.1    6.26
4.5    4.13
5.0    2.83
5.5    1.97
6.0    1.33
4.1    7.60
4.5    5.68
5.0    3.93
5.5    2.83
6.0    1.97
4.1    4.96
4.5    2.80
5.0    1.77
5.5    1.12
6.0    0.71];

ResetDoses
Rattus
Rat_6HCs

% Toluene study specific values as found in Hack tolune model, Haddad.M
BW=0.235; TCHNG=4.0; TSTOP=8.0;
CONC(1)=50.0; CONC(2)=50.0; CONC(3)=50.0;
VMAXC(1)=3.44; KM(1)=0.13;
start @nocallback
plotcvenT = plot (0, Had50Toluene(:,1), Had50Toluene(:,2), '+b', _t, _cven(:,1), '-b');
plotcvenE = plot (0, Had50Ethylben(:,1), Had50Ethylben(:,2), '+b', _t, _cven(:,2), '-b');
plotcvenX = plot (0, Had50Xylene(:,1), Had50Xylene(:,2), '+b', _t, _cven(:,3), '-b');

CONC(1)=100.0; CONC(2)=100.0; CONC(3)=100.0;
start @nocallback
plot (plotcvenT, 1, Had100Toluene(:,1), Had100Toluene(:,2), '+k', _t, _cven(:,1), '-k');
plot (plotcvenE, 1, Had100Ethylben(:,1), Had100Ethylben(:,2), '+k', _t, _cven(:,2), '-k');
plot (plotcvenX, 1, Had100Xylene(:,1), Had100Xylene(:,2), '+k', _t, _cven(:,3), '-k');

CONC(1)=200.0; CONC(2)=200.0; CONC(3)=200.0;
start @nocallback

```

```

plot (plotcvenT, 1, Had200Toluene(:,1), Had200Toluene(:,2), '+g', _t, _cven(:,1), '-g');
plot (plotcvenE, 1, Had200Ethylben(:,1), Had200Ethylben(:,2), '+g', _t, _cven(:,2), '-g');
plot (plotcvenX, 1, Had200Xylene(:,1), Had200Xylene(:,2), '+g', _t, _cven(:,3), '-g');

set @preference=BackslashEscapes
pltscript(plotcvenT, "Chart.Header.Text = \"Haddad et al. (1999) Toluene Inhalation Study\";")
pltscript(plotcvenT, "Chart.SubHeader.Text = \"50, 100, 200 ppm Inhalation for 4 Hours\";")
pltscript(plotcvenT, "Chart.SubHeader.Visible=true;")
pltscript(plotcvenT, "Chart.Axes.Left.Title.Text=\"Toluene in Venous Blood [mg/L]\";")
pltscript(plotcvenT, "Chart.Axes.Bottom.Title.Text=\"Hours\";")
pltscript(plotcvenT, "Chart.Series[0].Title=\"50 ppm\";")
pltscript(plotcvenT, "Chart.Series[1].Title=\"Simulation 50 ppm\";")
pltscript(plotcvenT, "Chart.Series[2].Title=\"100 ppm\";")
pltscript(plotcvenT, "Chart.Series[3].Title=\"Simulation 100 ppm\";")
pltscript(plotcvenT, "Chart.Series[4].Title=\"200 ppm\";")
pltscript(plotcvenT, "Chart.Series[5].Title=\"Simulation 200 ppm\";")

pltscript(plotcvenE, "Chart.Header.Text = \"Haddad et al. (1999) Ethylbenzene Inhalation Study\";")
pltscript(plotcvenE, "Chart.SubHeader.Text = \"50, 100, 200 ppm Inhalation for 4 Hours\";")
pltscript(plotcvenE, "Chart.SubHeader.Visible=true;")
pltscript(plotcvenE, "Chart.Axes.Left.Title.Text=\"Ethylbenzene in Venous Blood [mg/L]\";")
pltscript(plotcvenE, "Chart.Axes.Bottom.Title.Text=\"Hours\";")
pltscript(plotcvenE, "Chart.Series[0].Title=\"50 ppm\";")
pltscript(plotcvenE, "Chart.Series[1].Title=\"Simulation 50 ppm\";")
pltscript(plotcvenE, "Chart.Series[2].Title=\"100 ppm\";")
pltscript(plotcvenE, "Chart.Series[3].Title=\"Simulation 100 ppm\";")
pltscript(plotcvenE, "Chart.Series[4].Title=\"200 ppm\";")
pltscript(plotcvenE, "Chart.Series[5].Title=\"Simulation 200 ppm\";")

pltscript(plotcvenX, "Chart.Header.Text = \"Haddad et al. (1999) m-Xylene Inhalation Study\";")
pltscript(plotcvenX, "Chart.SubHeader.Text = \"50, 100, 200 ppm Inhalation for 4 Hours\";")
pltscript(plotcvenX, "Chart.SubHeader.Visible=true;")
pltscript(plotcvenX, "Chart.Axes.Left.Title.Text=\"m-Xylene in Venous Blood [mg/L]\";")
pltscript(plotcvenX, "Chart.Axes.Bottom.Title.Text=\"Hours\";")
pltscript(plotcvenX, "Chart.Series[0].Title=\"50 ppm\";")
pltscript(plotcvenX, "Chart.Series[1].Title=\"Simulation 50 ppm\";")
pltscript(plotcvenX, "Chart.Series[2].Title=\"100 ppm\";")
pltscript(plotcvenX, "Chart.Series[3].Title=\"Simulation 100 ppm\";")
pltscript(plotcvenX, "Chart.Series[4].Title=\"200 ppm\";")
pltscript(plotcvenX, "Chart.Series[5].Title=\"Simulation 200 ppm\";")
set @preference=NoBackslashEscapes

```

### C1to3\_Tardif.m

```

% Tardif, R., Charest-Tardif, G. and Brodeur, J. 1996. Comparison of the influence
%   of binary mixtures versus a ternary mixture of inhaled aromatic hydrocarbons
%   on their blood kinetics in the rat. Arch Toxicol 70(7): 405-413.

```

```

% Adult male SD rats (235-245 g)

```

```

% T, CVEN from Figure 1, mean followed by +SD then -SD

```

```

Tar100Toluene = [

```

```

    4.1    1.14
    4.5    0.69
    5.0    0.36
    5.5    0.23
    6.0    0.13
    4.1    1.53
    4.5    0.82
    5.0    0.44
    5.5    0.29
    6.0    0.19
    4.1    0.76
    4.5    0.55
    5.0    0.27
    5.5    0.17
    6.0    0.08];

```

```

% T, CVEN from Figure 1, mean followed by +SD then -SD

```

```

Tar100Ethylben = [

```

```

    4.1    1.92

```

---

```
4.5  1.27
5.0  0.86
5.5  0.53
6.0  0.35
4.1  2.11
4.5  1.42
5.0  1.08
5.5  0.66
6.0  0.41
4.1  1.79
4.5  1.14
5.0  0.63
5.5  0.43
6.0  0.29];

% T, CVEN from Figure 1, mean followed by +SD then -SD
Tar100Xylene = [
4.1  1.26
4.5  0.86
5.0  0.51
5.5  0.37
6.0  0.24
4.1  1.44
4.5  1.01
5.0  0.62
5.5  0.43
6.0  0.30
4.1  1.09
4.5  0.71
5.0  0.43
5.5  0.31
6.0  0.15];

% T, CVEN from Figure 2, mean followed by +SD then -SD
Tar200Toluene = [
4.1  4.34
4.5  3.17
5.0  1.96
5.5  1.19
6.0  0.79
4.1  5.29
4.5  3.94
5.0  2.31
5.5  1.42
6.0  0.89
4.1  3.37
4.5  2.47
5.0  1.66
5.5  0.93
6.0  0.64];

% T, CVEN from Figure 4, mean followed by +SD then -SD
Tar200Ethylben = [
4.1  7.67
4.5  4.96
5.0  3.47
5.5  2.50
6.0  1.71
4.1  8.22
4.5  5.51
5.0  3.82
5.5  2.78
6.0  2.01
4.1  6.92
4.5  4.42
5.0  3.25
5.5  2.20
6.0  1.39];

% T, CVEN from Figure 3, mean followed by +SD then -SD
Tar200Xylene = [
4.1  6.32
```

```

4.5  4.26
5.0  2.83
5.5  1.99
6.0  1.37
4.1  7.80
4.5  5.74
5.0  3.95
5.5  2.83
6.0  2.04
4.1  4.89
4.5  2.83
5.0  1.75
5.5  1.12
6.0  0.74];

ResetDoses
Rattus
Rat_6HCs

BW=0.240; TCHNG=4.0; TSTOP=6.0;
CONC(1)=100.0; CONC(2)=100.0; CONC(3)=100.0;
start @nocallback
plotcvenT = plot (0, Tar100Toluene(:,1), Tar100Toluene(:,2), '+b', _t, _cven(:,1), '-b');
plotcvenE = plot (0, Tar100Ethylben(:,1), Tar100Ethylben(:,2), '+b', _t, _cven(:,2), '-b');
plotcvenX = plot (0, Tar100Xylene(:,1), Tar100Xylene(:,2), '+b', _t, _cven(:,3), '-b');

CONC(1)=200.0; CONC(2)=200.0; CONC(3)=200.0;
start @nocallback
plotcvenT = plot (plotcvenT, 1, Tar200Toluene(:,1), Tar200Toluene(:,2), '+k', _t, _cven(:,1), '-k');
plotcvenE = plot (plotcvenE, 1, Tar200Ethylben(:,1), Tar200Ethylben(:,2), '+k', _t, _cven(:,2), '-k');
plotcvenX = plot (plotcvenX, 1, Tar200Xylene(:,1), Tar200Xylene(:,2), '+k', _t, _cven(:,3), '-k');

set @preference=BackslashEscapes
    pltscrip(plotcvenT, "Chart.Header.Text = \"Tardif et al. (1996) Toluene Inhalation Study\";")
    pltscrip(plotcvenT, "Chart.SubHeader.Text = \"100, 200 ppm Inhalation for 4 Hours\";")
    pltscrip(plotcvenT, "Chart.SubHeader.Visible=true;")
    % pltscrip(plotcvenT, "Chart.Axes.Left.Automatic=false;")
    % pltscrip(plotcvenT, "Chart.Axes.Left.Minimum=0.0;")
    % pltscrip(plotcvenT, "Chart.Axes.Left.Maximum=2.0;")
    pltscrip(plotcvenT, "Chart.Axes.Left.Title.Text=\"Toluene in Venous Blood [mg/L]\";")
    % pltscrip(plotcvenT, "Chart.Axes.Bottom.Automatic=false;")
    % pltscrip(plotcvenT, "Chart.Axes.Bottom.Minimum=0.0;")
    % pltscrip(plotcvenT, "Chart.Axes.Bottom.Maximum=60.0;")
    pltscrip(plotcvenT, "Chart.Axes.Bottom.Title.Text=\"Hours\";")
    pltscrip(plotcvenT, "Chart.Series[0].Title=\"100 ppm\";")
    pltscrip(plotcvenT, "Chart.Series[1].Title=\"Simulation 100 ppm\";")
    pltscrip(plotcvenT, "Chart.Series[2].Title=\"200 ppm\";")
    pltscrip(plotcvenT, "Chart.Series[3].Title=\"Simulation 200 ppm\";")

    pltscrip(plotcvenE, "Chart.Header.Text = \"Tardif et al. (1996) Ethylbenzene Inhalation Study\";")
    pltscrip(plotcvenE, "Chart.SubHeader.Text = \"100, 200 ppm Inhalation for 4 Hours\";")
    pltscrip(plotcvenE, "Chart.SubHeader.Visible=true;")
    % pltscrip(plotcvenE, "Chart.Axes.Left.Automatic=false;")
    % pltscrip(plotcvenE, "Chart.Axes.Left.Minimum=0.0;")
    % pltscrip(plotcvenE, "Chart.Axes.Left.Maximum=2.0;")
    pltscrip(plotcvenE, "Chart.Axes.Left.Title.Text=\"Ethylbenzene in Venous Blood [mg/L]\";")
    % pltscrip(plotcvenE, "Chart.Axes.Bottom.Automatic=false;")
    % pltscrip(plotcvenE, "Chart.Axes.Bottom.Minimum=0.0;")
    % pltscrip(plotcvenE, "Chart.Axes.Bottom.Maximum=60.0;")
    pltscrip(plotcvenE, "Chart.Axes.Bottom.Title.Text=\"Hours\";")
    pltscrip(plotcvenE, "Chart.Series[0].Title=\"100 ppm\";")
    pltscrip(plotcvenE, "Chart.Series[1].Title=\"Simulation 100 ppm\";")
    pltscrip(plotcvenE, "Chart.Series[2].Title=\"200 ppm\";")
    pltscrip(plotcvenE, "Chart.Series[3].Title=\"Simulation 200 ppm\";")

    pltscrip(plotcvenX, "Chart.Header.Text = \"Tardif et al. (1996) m-Xylene Inhalation Study\";")
    pltscrip(plotcvenX, "Chart.SubHeader.Text = \"100, 200 ppm Inhalation for 4 Hours\";")
    pltscrip(plotcvenX, "Chart.SubHeader.Visible=true;")
    % pltscrip(plotcvenX, "Chart.Axes.Left.Automatic=false;")
    % pltscrip(plotcvenX, "Chart.Axes.Left.Minimum=0.0;")
    % pltscrip(plotcvenX, "Chart.Axes.Left.Maximum=2.0;")
    pltscrip(plotcvenX, "Chart.Axes.Left.Title.Text=\"Xylene in Venous Blood [mg/L]\";")
    % pltscrip(plotcvenX, "Chart.Axes.Bottom.Automatic=false;")
    % pltscrip(plotcvenX, "Chart.Axes.Bottom.Minimum=0.0;")
    % pltscrip(plotcvenX, "Chart.Axes.Bottom.Maximum=60.0;")

```

```

pltscript(plotcvenX, "Chart.Axes.Bottom.Title.Text=\"Hours\";")
pltscript(plotcvenX, "Chart.Series[0].Title=\"100 ppm\";")
pltscript(plotcvenX, "Chart.Series[1].Title=\"Simulation 100 ppm\";")
pltscript(plotcvenX, "Chart.Series[2].Title=\"200 ppm\";")
pltscript(plotcvenX, "Chart.Series[3].Title=\"Simulation 200 ppm\";")
set @preference=NoBackslashEscapes

```

## C4\_Robinson.m

```

% Robinson, P.J. and Merrill, E.A. 2008. A harmonized physiologically based pharmacokinetic model
% for nonane as a component of jet fuel. Wright-Patterson AFB, OH: Air Force Research
% Laboratory, Applied Biotechnology Branch. AFRL-RH-WP-TR-2008-0067, ADA502610.

```

```

% (t, cven, cfat, cliv, cslw)
Inh90d100 = [
    0.5    0.372    NaN    NaN    NaN
    0.5    0.427    NaN    NaN    NaN
    0.5    0.482    NaN    NaN    NaN
    1.0    0.370    NaN    NaN    NaN
    1.0    0.523    NaN    NaN    NaN
    1.0    0.676    NaN    NaN    NaN
    2.0    0.306    NaN    NaN    NaN
    2.0    0.516    NaN    NaN    NaN
    2.0    0.726    NaN    NaN    NaN
    3.0    0.496    NaN    NaN    NaN
    3.0    0.676    NaN    NaN    NaN
    3.0    0.856    NaN    NaN    NaN
    4.0    0.808    13.93    1.44    1.0
    4.0    0.891    27.24    3.83    2.76
    4.0    0.974    40.55    6.22    4.52
    4.08    0.292    NaN    NaN    NaN
    4.08    0.43    NaN    NaN    NaN
    4.08    0.568    NaN    NaN    NaN
    4.16    0.2251    NaN    NaN    NaN
    4.16    0.362    NaN    NaN    NaN
    4.16    0.498    NaN    NaN    NaN
    4.25    0.191    NaN    NaN    NaN
    4.25    0.304    NaN    NaN    NaN
    4.25    0.417    NaN    NaN    NaN
    4.5     0.097    NaN    NaN    NaN
    4.5     0.205    NaN    NaN    NaN
    4.5     0.313    NaN    NaN    NaN
    5.0     0.053    NaN    NaN    NaN
    5.0     0.114    NaN    NaN    NaN
    5.0     0.175    NaN    NaN    NaN
    6.0     0.004    NaN    NaN    NaN
    6.0     0.037    NaN    NaN    NaN
    6.0     0.07    NaN    NaN    NaN
    7.0     0.003    NaN    NaN    NaN
    7.0     0.03    NaN    NaN    NaN
    7.0     0.057    NaN    NaN    NaN
    8.0     0.0     8.29    0.0     0.0
    8.0     0.019    18.65    0.05    0.7
    8.0     0.042    29.01    0.22    1.65];

```

```

% (t, CV1, CF1, CL1, CS1)
Inh90d500 = [
    0.6    1.311    NaN    NaN    NaN
    0.6    2.051    NaN    NaN    NaN
    0.6    2.791    NaN    NaN    NaN
    1.1    1.406    NaN    NaN    NaN
    1.1    2.263    NaN    NaN    NaN
    1.1    3.12    NaN    NaN    NaN
    2.1    2.934    NaN    NaN    NaN
    2.1    3.736    NaN    NaN    NaN
    2.1    4.538    NaN    NaN    NaN
    3.1    2.201    NaN    NaN    NaN
    3.1    3.635    NaN    NaN    NaN
    3.1    5.069    NaN    NaN    NaN
    4.1    3.504    66.01    25.03    11.71
    4.1    4.43    131.11    39.63    17.33
    4.1    5.356    196.21    54.23    22.95

```

---

```

4.18 3.0 NaN NaN NaN
4.18 3.75 NaN NaN NaN
4.18 4.5 NaN NaN NaN
4.26 1.902 NaN NaN NaN
4.26 2.785 NaN NaN NaN
4.26 3.668 NaN NaN NaN
4.35 1.322 NaN NaN NaN
4.35 1.953 NaN NaN NaN
4.35 2.584 NaN NaN NaN
4.6 1.34 NaN NaN NaN
4.6 1.768 NaN NaN NaN
4.6 2.196 NaN NaN NaN
5.1 0.811 NaN NaN NaN
5.1 1.184 NaN NaN NaN
5.1 1.557 NaN NaN NaN
6.1 0.218 NaN NaN NaN
6.1 0.41 NaN NaN NaN
6.1 0.602 NaN NaN NaN
7.1 0.195 NaN NaN NaN
7.1 0.365 NaN NaN NaN
7.1 0.535 NaN NaN NaN
8.1 0.152 52.64 0.34 0.0
8.1 0.251 82.2 0.48 4.96
8.1 0.35 111.76 0.62 10.08];

% (t, CV1, CF1, CL1, CS1)
Inh90d1000 = [
0.7 1.682 NaN NaN NaN
0.7 6.933 NaN NaN NaN
0.7 12.184 NaN NaN NaN
1.2 3.385 NaN NaN NaN
1.2 6.95 NaN NaN NaN
1.2 10.515 NaN NaN NaN
2.2 9.405 NaN NaN NaN
2.2 15.211 NaN NaN NaN
2.2 21.017 NaN NaN NaN
3.2 7.789 NaN NaN NaN
3.2 16.928 NaN NaN NaN
3.2 26.067 NaN NaN NaN
4.2 4.724 66.86 47.91 23.61
4.2 16.467 360.28 99.9 45.0
4.2 28.21 653.7 151.91 66.39
4.28 6.904 NaN NaN NaN
4.28 13.625 NaN NaN NaN
4.28 20.346 NaN NaN NaN
4.36 2.902 NaN NaN NaN
4.36 10.88 NaN NaN NaN
4.36 18.858 NaN NaN NaN
4.45 3.02 NaN NaN NaN
4.45 9.281 NaN NaN NaN
4.45 15.542 NaN NaN NaN
4.7 1.649 NaN NaN NaN
4.7 5.073 NaN NaN NaN
4.7 8.497 NaN NaN NaN
5.2 0.888 NaN NaN NaN
5.2 4.403 NaN NaN NaN
5.2 7.918 NaN NaN NaN
6.2 0.638 NaN NaN NaN
6.2 2.378 NaN NaN NaN
6.2 4.118 NaN NaN NaN
7.2 0.514 NaN NaN NaN
7.2 1.483 NaN NaN NaN
7.2 2.452 NaN NaN NaN
8.2 0.247 155.42 2.2 7.07
8.2 0.687 316.26 7.15 21.11
8.2 1.127 477.1 12.1 35.15];

ResetDoses
Rattus
Rat_6HCs

% Study specific setting found in C1_In_House_Inhal.M from 4Chem9r5 model
BW=0.3; CONC(4)=100.0; TCHNG=4.0; TSTOP=10;
start @nocallback
plotcven = plot (0, Inh90d100(:,1), Inh90d100(:,2), '+b', _t, _cven(:,4), '-b');

```

```

plotcfat = plot (0, Inh90d100(:,1), Inh90d100(:,3), '+b', _t, _cfat(:,4), '-b');
plotcliv = plot (0, Inh90d100(:,1), Inh90d100(:,4), '+b', _t, _cliv(:,4), '-b');
plotcslw = plot (0, Inh90d100(:,1), Inh90d100(:,5), '+b', _t, _cslw(:,4), '-b');

CONC(4)=500.0; TCHNG(4)=4.1;
start @nocallback
plot (plotcven, 1, Inh90d500(:,1), Inh90d500(:,2), '+k', _t, _cven(:,4), '-k');
plot (plotcfat, 1, Inh90d500(:,1), Inh90d500(:,3), '+k', _t, _cfat(:,4), '-k');
plot (plotcliv, 1, Inh90d500(:,1), Inh90d500(:,4), '+k', _t, _cliv(:,4), '-k');
plot (plotcslw, 1, Inh90d500(:,1), Inh90d500(:,5), '+k', _t, _cslw(:,4), '-k');

CONC(4)=1000.0; TCHNG(4)=4.2;
start @nocallback
plot (plotcven, 1, Inh90d500(:,1), Inh90d1000(:,2), '+g', _t, _cven(:,4), '-g');
plot (plotcfat, 1, Inh90d500(:,1), Inh90d1000(:,3), '+g', _t, _cfat(:,4), '-g');
plot (plotcliv, 1, Inh90d500(:,1), Inh90d1000(:,4), '+g', _t, _cliv(:,4), '-g');
plot (plotcslw, 1, Inh90d500(:,1), Inh90d1000(:,5), '+g', _t, _cslw(:,4), '-g');

set @preference=BackslashEscapes
pltscript(plotcven, "Chart.Header.Text = \"In-House Nonane Inhalation Study\";")
pltscript(plotcven, "Chart.SubHeader.Text = \"100, 500, 1000 ppm Inhalation for 4 Hours\";")
pltscript(plotcven, "Chart.SubHeader.Visible=true;")
pltscript(plotcven, "Chart.Axes.Left.Title.Text=\"Nonane in Venous Blood [mg/L]\";")
pltscript(plotcven, "Chart.Axes.Bottom.Title.Text=\"Hours\";")
pltscript(plotcven, "Chart.Series[0].Title=\"100 ppm\";")
pltscript(plotcven, "Chart.Series[1].Title=\"Simulation 100 ppm\";")
pltscript(plotcven, "Chart.Series[2].Title=\"500 ppm\";")
pltscript(plotcven, "Chart.Series[3].Title=\"Simulation 500 ppm\";")
pltscript(plotcven, "Chart.Series[4].Title=\"1000 ppm\";")
pltscript(plotcven, "Chart.Series[5].Title=\"Simulation 1000 ppm\";")

pltscript(plotcfat, "Chart.Header.Text = \"In-House Nonane Inhalation Study\";")
pltscript(plotcfat, "Chart.SubHeader.Text = \"100, 500, 1000 ppm Inhalation for 4 Hours\";")
pltscript(plotcfat, "Chart.SubHeader.Visible=true;")
pltscript(plotcfat, "Chart.Axes.Left.Title.Text=\"Nonane in Fat [mg/L]\";")
pltscript(plotcfat, "Chart.Axes.Bottom.Title.Text=\"Hours\";")
pltscript(plotcfat, "Chart.Series[0].Title=\"100 ppm\";")
pltscript(plotcfat, "Chart.Series[1].Title=\"Simulation 100 ppm\";")
pltscript(plotcfat, "Chart.Series[2].Title=\"500 ppm\";")
pltscript(plotcfat, "Chart.Series[3].Title=\"Simulation 500 ppm\";")
pltscript(plotcfat, "Chart.Series[4].Title=\"1000 ppm\";")
pltscript(plotcfat, "Chart.Series[5].Title=\"Simulation 1000 ppm\";")

pltscript(plotcliv, "Chart.Header.Text = \"In-House Nonane Inhalation Study\";")
pltscript(plotcliv, "Chart.SubHeader.Text = \"100, 500, 1000 ppm Inhalation for 4 Hours\";")
pltscript(plotcliv, "Chart.SubHeader.Visible=true;")
pltscript(plotcliv, "Chart.Axes.Left.Title.Text=\"Nonane in Liver [mg/L]\";")
pltscript(plotcliv, "Chart.Axes.Bottom.Title.Text=\"Hours\";")
pltscript(plotcliv, "Chart.Series[0].Title=\"100 ppm\";")
pltscript(plotcliv, "Chart.Series[1].Title=\"Simulation 100 ppm\";")
pltscript(plotcliv, "Chart.Series[2].Title=\"500 ppm\";")
pltscript(plotcliv, "Chart.Series[3].Title=\"Simulation 500 ppm\";")
pltscript(plotcliv, "Chart.Series[4].Title=\"1000 ppm\";")
pltscript(plotcliv, "Chart.Series[5].Title=\"Simulation 1000 ppm\";")

pltscript(plotcslw, "Chart.Header.Text = \"In-House Nonane Inhalation Study\";")
pltscript(plotcslw, "Chart.SubHeader.Text = \"100, 500, 1000 ppm Inhalation for 4 Hours\";")
pltscript(plotcslw, "Chart.SubHeader.Visible=true;")
pltscript(plotcslw, "Chart.Axes.Left.Title.Text=\"Nonane in Slowly Perfused Tissues [mg/L]\";")
pltscript(plotcslw, "Chart.Axes.Bottom.Title.Text=\"Hours\";")
pltscript(plotcslw, "Chart.Series[0].Title=\"100 ppm\";")
pltscript(plotcslw, "Chart.Series[1].Title=\"Simulation 100 ppm\";")
pltscript(plotcslw, "Chart.Series[2].Title=\"500 ppm\";")
pltscript(plotcslw, "Chart.Series[3].Title=\"Simulation 500 ppm\";")
pltscript(plotcslw, "Chart.Series[4].Title=\"1000 ppm\";")
pltscript(plotcslw, "Chart.Series[5].Title=\"Simulation 1000 ppm\";")
set @preference=NoBackslashEscapes

```

#### C4to5\_Loff99.m

```

% Lof, A., Lam, H.R., Gullstrand, E., Ostergaard, G. and Ladefoged, O. 1999. Distribution of
% dearomatised white spirit in brain, blood, and fat tissue after repeated exposure of
% rats. Pharmacol.Toxicol. 85(2): 92-97.

```

---

```
% Rats dosed with 400 and 800 ppm white spirits
% 3.6% n-nonane = 14.4 and 28.8 ppm nonane, respectively
% 16.6% n-decane = 106.4 and 212 ppm decane, respectively
```

```
% (T, CVen, CBrnTot, CFat)
Lof99LoNonane = [
  102.0  0.1  0.73  27.26
  102.0  0.14 1.17  32.0
  102.0  0.06 0.29  22.52
  270.0  0.09 0.65  32.5
  270.0  0.15 0.85  39.7
  270.0  0.03 0.45  25.3
  438.0  0.1  0.54  29.06
  438.0  0.13 0.62  34.41
  438.0  0.07 0.46  23.71
  440.0  0.03 0.24  33.85
  440.0  0.04 0.27  41.22
  440.0  0.02 0.21  26.48
  442.0  0.02 0.19  29.75
  442.0  0.03 0.24  35.48
  442.0  0.01 0.14  24.02
  444.0  0.02 0.14  28.54
  444.0  0.03 0.18  32.46
  444.0  0.01 0.1  24.62
  462.0  0.01 0.18  23.75
  462.0  0.01 0.24  24.58
  462.0  0.01 0.12  22.92];
```

```
% (T, CVen, CBrnTot, CFat)
% Additional data are present in the original cmd file, but commented out
Lof99LoDecane = [
  102.0  0.7  3.35  150.3
  102.0  0.86 4.99  178.94
  102.0  0.54 1.71  121.66
  270.0  0.88 2.64  182.8
  270.0  1.1  3.27  222.1
  270.0  0.66 2.01  143.5
  438.0  0.7  2.34  172.1
  438.0  0.81 2.89  198.4
  438.0  0.59 1.79  145.8
  440.0  0.3  1.24  202.8
  440.0  0.35 1.34  256.19
  440.0  0.25 1.14  149.41
  442.0  0.24 0.78  190.8
  442.0  0.29 0.93  218.12
  442.0  0.19 0.63  163.48
  444.0  0.21 0.54  191.7
  444.0  0.25 0.72  228.18
  444.0  0.17 0.36  155.22
  462.0  0.13 0.45  166.5
  462.0  0.16 0.88  187.19
  462.0  0.1  0.02  145.81];
```

```
% (T, CVen, CBrnTot, CFat)
Lof99HiNonane = [
  102.0  0.26  1.2  69.82
  102.0  0.41  1.58  81.94
  102.0  0.11  0.82  57.7
  270.0  0.21  1.31  90.39
  270.0  0.31  1.54  111.72
  270.0  0.11  1.08  69.06
  438.0  0.32  1.27  99.51
  438.0  0.44  1.4  127.56
  438.0  0.2  1.14  71.46
  440.0  0.06  0.32  88.96
  440.0  0.08  0.4  101.56
  440.0  0.04  0.24  76.36
  442.0  0.03  0.34  74.76
  442.0  0.04  0.51  82.0
  442.0  0.02  0.17  67.52
  444.0  0.02  0.2  69.3
```



```

444.0    0.03    0.23    75.36
444.0    0.01    0.17    63.24
462.0    0.02    0.18    50.07
462.0    0.02    0.25    58.5
462.0    0.02    0.11    41.64];

% (T, CVen, CBrnTot, CFat)
Lof99HiDecane = [
    102.0    2.09    6.08    440.2
    102.0    2.78    7.62    493.34
    102.0    1.4     4.54    387.06
    270.0    1.73    6.24    537.7
    270.0    2.12    6.96    642.8
    270.0    1.34    5.52    432.6
    438.0    2.21    5.95    590.5
    438.0    2.75    7.19    770.5
    438.0    1.67    4.71    410.5
    440.0    0.57    2.91    547.3
    440.0    0.64    3.24    616.49
    440.0    0.5     2.58    478.11
    442.0    0.44    1.96    511.9
    442.0    0.48    2.8     571.78
    442.0    0.4     1.12    452.02
    444.0    0.36    1.14    489.6
    444.0    0.42    1.37    534.2
    444.0    0.3     0.91    445.0
    462.0    0.16    0.57    426.0
    462.0    0.18    0.97    462.76
    462.0    0.14    0.17    389.24];

ResetDoses
Rattus
Rat_6HCs

% Default BW from 4Chem9r5 model; No study specific given
BW=0.3; TCHNG=6.0; DOSEINT=24.0; DAYSWK=5.0; TMAX=504.0; CINT=0.1; TSTOP=525.0;
CONC(4)=14.4; CONC(5)=106.4;
start @nocallback
plotcvenN = plot (0, Lof99LoNonane(:,1), Lof99LoNonane(:,2), '+b', _t, _cven(:,4), '-b');
plotcvenD = plot (0, Lof99LoDecane(:,1), Lof99LoDecane(:,2), '+b', _t, _cven(:,5), '-b');
plotcbrntotN = plot (0, Lof99HiNonane(:,1), Lof99HiNonane(:,3), '+b', _t, _cbrntot(:,4), '-b');
plotcbrntotD = plot (0, Lof99LoDecane(:,1), Lof99LoDecane(:,3), '+b', _t, _cbrntot(:,5), '-b');
plotcfatN = plot (0, Lof99HiNonane(:,1), Lof99HiNonane(:,4), '+b', _t, _cfat(:,4), '-b');
plotcfatD = plot (0, Lof99LoDecane(:,1), Lof99LoDecane(:,4), '+b', _t, _cfat(:,5), '-b');

CONC(4)=28.8; CONC(5)=212.0;
start @nocallback
plot (plotcvenN, 1, Lof99HiNonane(:,1), Lof99HiNonane(:,2), '+k', _t, _cven(:,4), '-k');
plot (plotcvenD, 1, Lof99HiDecane(:,1), Lof99HiDecane(:,2), '+k', _t, _cven(:,5), '-k');
plot (plotcbrntotN, 1, Lof99HiNonane(:,1), Lof99HiNonane(:,3), '+k', _t, _cbrntot(:,4), '-k');
plot (plotcbrntotD, 1, Lof99HiDecane(:,1), Lof99HiDecane(:,3), '+k', _t, _cbrntot(:,5), '-k');
plot (plotcfatN, 1, Lof99HiNonane(:,1), Lof99HiNonane(:,4), '+k', _t, _cfat(:,4), '-k');
plot (plotcfatD, 1, Lof99HiDecane(:,1), Lof99HiDecane(:,4), '+k', _t, _cfat(:,5), '-k');

set @preference=BackslashEscapes
pltscript(plotcvenN, "Chart.Header.Text = \"Lof et al. (1999) White Spirits Inhalation Study\";")
pltscript(plotcvenN, "Chart.SubHeader.Text = \"14.4 and 28.8 ppm for 6 Hours\";")
pltscript(plotcvenN, "Chart.SubHeader.Visible=true;")
pltscript(plotcvenN, "Chart.Axes.Left.Title.Text=\"Nonane in Venous Blood [mg/L]\";")
pltscript(plotcvenN, "Chart.Axes.Bottom.Title.Text=\"Hours\";")
pltscript(plotcvenN, "Chart.Series[0].Title=\"14.4 ppm\";")
pltscript(plotcvenN, "Chart.Series[1].Title=\"Simulation 14.4 ppm\";")
pltscript(plotcvenN, "Chart.Series[2].Title=\"28.8 ppm\";")
pltscript(plotcvenN, "Chart.Series[3].Title=\"Simulation 28.8 ppm\";")

pltscript(plotcvenD, "Chart.Header.Text = \"Lof et al. (1999) White Spirits Inhalation Study\";")
pltscript(plotcvenD, "Chart.SubHeader.Text = \"106.4 and 212 ppm for 6 Hours\";")
pltscript(plotcvenD, "Chart.SubHeader.Visible=true;")
pltscript(plotcvenD, "Chart.Axes.Left.Title.Text=\"Decane in Venous Blood [mg/L]\";")
pltscript(plotcvenD, "Chart.Axes.Bottom.Title.Text=\"Hours\";")
pltscript(plotcvenD, "Chart.Series[0].Title=\"106.4 ppm\";")
pltscript(plotcvenD, "Chart.Series[1].Title=\"Simulation 106.4 ppm\";")

```

```

pltscript(plotcvenD, "Chart.Series[2].Title=\"212 ppm\";")
pltscript(plotcvenD, "Chart.Series[3].Title=\"Simulation 212 ppm\";")

pltscript(plotcbrntotN, "Chart.Header.Text = \"Lof et al. (1999) White Spirits Inhalation Study\";")
pltscript(plotcbrntotN, "Chart.SubHeader.Text = \"14.4 and 28.8 ppm for 6 Hours\";")
pltscript(plotcbrntotN, "Chart.SubHeader.Visible=true;")
pltscript(plotcbrntotN, "Chart.Axes.Left.Title.Text=\"Nonane in Total Brain [mg/L]\";")
pltscript(plotcbrntotN, "Chart.Axes.Bottom.Title.Text=\"Hours\";")
pltscript(plotcbrntotN, "Chart.Series[0].Title=\"14.4 ppm\";")
pltscript(plotcbrntotN, "Chart.Series[1].Title=\"Simulation 14.4 ppm\";")
pltscript(plotcbrntotN, "Chart.Series[2].Title=\"28.8 ppm\";")
pltscript(plotcbrntotN, "Chart.Series[3].Title=\"Simulation 28.8 ppm\";")

pltscript(plotcbrntotD, "Chart.Header.Text = \"Lof et al. (1999) White Spirits Inhalation Study\";")
pltscript(plotcbrntotD, "Chart.SubHeader.Text = \"106.4 and 212 ppm for 6 Hours\";")
pltscript(plotcbrntotD, "Chart.SubHeader.Visible=true;")
pltscript(plotcbrntotD, "Chart.Axes.Left.Title.Text=\"Decane in Total Brain [mg/L]\";")
pltscript(plotcbrntotD, "Chart.Axes.Bottom.Title.Text=\"Hours\";")
pltscript(plotcbrntotD, "Chart.Series[0].Title=\"106.4 ppm\";")
pltscript(plotcbrntotD, "Chart.Series[1].Title=\"Simulation 106.4 ppm\";")
pltscript(plotcbrntotD, "Chart.Series[2].Title=\"212 ppm\";")
pltscript(plotcbrntotD, "Chart.Series[3].Title=\"Simulation 212 ppm\";")

pltscript(plotcfatN, "Chart.Header.Text = \"Lof et al. (1999) White Spirits Inhalation Study\";")
pltscript(plotcfatN, "Chart.SubHeader.Text = \"14.4 and 28.8 ppm for 6 Hours\";")
pltscript(plotcfatN, "Chart.SubHeader.Visible=true;")
pltscript(plotcfatN, "Chart.Axes.Left.Title.Text=\"Nonane in Fat [mg/L]\";")
pltscript(plotcfatN, "Chart.Axes.Bottom.Title.Text=\"Hours\";")
pltscript(plotcfatN, "Chart.Series[0].Title=\"14.4 ppm\";")
pltscript(plotcfatN, "Chart.Series[1].Title=\"Simulation 14.4 ppm\";")
pltscript(plotcfatN, "Chart.Series[2].Title=\"28.8 ppm\";")
pltscript(plotcfatN, "Chart.Series[3].Title=\"Simulation 28.8 ppm\";")

pltscript(plotcfatD, "Chart.Header.Text = \"Lof et al. (1999) White Spirits Inhalation Study\";")
pltscript(plotcfatD, "Chart.SubHeader.Text = \"106.4 and 212 ppm for 6 Hours\";")
pltscript(plotcfatD, "Chart.SubHeader.Visible=true;")
pltscript(plotcfatD, "Chart.Axes.Left.Title.Text=\"Decane in Fat [mg/L]\";")
pltscript(plotcfatD, "Chart.Axes.Bottom.Title.Text=\"Hours\";")
pltscript(plotcfatD, "Chart.Series[0].Title=\"106.4 ppm\";")
pltscript(plotcfatD, "Chart.Series[1].Title=\"Simulation 106.4 ppm\";")
pltscript(plotcfatD, "Chart.Series[2].Title=\"212 ppm\";")
pltscript(plotcfatD, "Chart.Series[3].Title=\"Simulation 212 ppm\";")
set @preference=NoBackslashEscapes

```

## C5\_Perleberg04.m

```

% Perleberg, U.R., Keys, D.A. and Fisher, J.W. 2004. Development of a physiologically
% based pharmacokinetic model for decane, a constituent of Jet Propellant-8.
% Inhal.Toxicol. 16(11-12): 771-783.

```

```

% (1-T, 2-Cart, 3-CLiv, 4-CBrnTot, 5-CRap, 6-CFat, 7-conc-bone-marrow, 8-conc-skin)
Perl1200 = [
4.08 4.34 33.74 120.38 11.09 104.91 260.89 8.18
4.08 4.79 37.96 131.21 13.08 122.68 315.37 9.83
4.08 3.89 29.52 109.55 9.10 87.15 206.42 6.53
4.50 0.63 17.48 94.85 11.02 60.51 195.57 8.72
4.50 0.82 23.02 108.64 13.91 81.42 272.81 10.82
4.50 0.44 11.94 81.07 8.12 39.60 118.33 6.622
5.00 0.58 5.17 73.29 5.84 112.89 NaN 24.12
5.00 0.72 6.15 75.55 7.44 142.72 NaN 37.15
5.00 0.45 4.18 71.04 4.23 83.05 NaN 11.09
6.00 0.26 1.16 45.37 4.97 88.52 158.30 10.43
6.00 0.32 1.64 48.94 6.32 107.13 200.46 13.81
6.00 0.20 0.69 41.80 3.62 69.91 116.14 7.050
8.00 0.15 0.55 14.76 3.23 94.43 NaN 8.363
8.00 0.19 0.74 15.76 3.76 118.91 NaN 13.45
8.00 0.10 0.37 13.76 2.71 69.94 NaN 3.277
10.00 NaN NaN 6.90 3.82 101.23 57.139 20.98
10.00 NaN NaN 7.77 5.48 123.56 66.751 29.04
10.00 NaN NaN 6.02 2.17 78.89 47.528 12.93
16.00 NaN NaN 2.09 2.85 74.96 6.140 0.861
16.00 NaN NaN 2.28 4.15 83.96 6.911 1.463
16.00 NaN NaN 1.90 1.55 65.96 5.370 0.259

```

```

28.00    NaN    NaN    0.36    2.45    55.34    1.348    1.004
28.00    NaN    NaN    0.45    3.66    64.11    1.672    1.572
28.00    NaN    NaN    0.27    1.24    46.57    1.025    0.435];

% (1-T, 2-CArt, 3-CLiv, 4-CBrnTot, 5-CRap, 6-CFat, 7-conc-bone-marrow, 8-conc-skin)
Perl781 = [
    4.00    2.68    34.8    61.1    12.1    51.1    109.64    NaN
    4.00    3.58    45.1    65.9    16.7    72.3    163.83    NaN
    4.00    1.78    24.5    56.2    7.42    29.7    55.469    NaN];

% (1-T, 2-CArt, 3-CLiv, 4-CBrnTot, 5-CRap, 6-CFat, 7-conc-bone-marrow, 8-conc-skin)
Perl273 = [
    4.00    0.49    4.39    18.3    2.14    14.3    52.479    1.45
    4.00    0.65    5.30    21.1    2.76    23.3    66.393    1.45
    4.00    0.34    3.49    16.1    1.53    5.34    38.565    0.79];

ResetDoses
Rattus
Rat_6HCs

% Note: the above M file indicates that Dr. Merrill may have used a PAFAT=0.06 for this study only, but the M
file used 0.7 anyway (DecaneRat)
BW=0.211; CONC(5)=1200.0; TCHNG=4.0; DOSEINT=24.0; DAYSWK=5.0; TMAX=24.0; CINT=0.1; TSTOP=30.0;
% PFAT=0.06;
start @nocallback
plotcart = plot (0, Perl1200(:,1), Perl1200(:,2), '+b', _t, _cart(:,5), '-b');
plotcliv = plot (0, Perl1200(:,1), Perl1200(:,3), '+b', _t, _cliv(:,5), '-b');
plotcbrntot = plot (0, Perl1200(:,1), Perl1200(:,4), '+b', _t, _cbrntot(:,5), '-b');
plotcrap = plot (0, Perl1200(:,1), Perl1200(:,5), '+b', _t, _crap(:,5), '-b');
plotcfat = plot (0, Perl1200(:,1), Perl1200(:,6), '+b', _t, _cfat(:,5), '-b');

CONC(5)=781.0; TSTOP=5.0;
start @nocallback
plot (plotcart, 1, Perl781(:,1), Perl781(:,2), '+k', _t, _cart(:,5), '-k');
plot (plotcliv, 1, Perl781(:,1), Perl781(:,3), '+k', _t, _cliv(:,5), '-k');
plot (plotcbrntot, 1, Perl781(:,1), Perl781(:,4), '+k', _t, _cbrntot(:,5), '-k');
plot (plotcrap, 1, Perl781(:,1), Perl781(:,5), '+k', _t, _crap(:,5), '-k');
plot (plotcfat, 1, Perl781(:,1), Perl781(:,6), '+k', _t, _cfat(:,5), '-k');

CONC(5)=273.0;
start @nocallback
plot (plotcart, 1, Perl273(:,1), Perl273(:,2), '+g', _t, _cart(:,5), '-g');
plot (plotcliv, 1, Perl273(:,1), Perl273(:,3), '+g', _t, _cliv(:,5), '-g');
plot (plotcbrntot, 1, Perl273(:,1), Perl273(:,4), '+g', _t, _cbrntot(:,5), '-g');
plot (plotcrap, 1, Perl273(:,1), Perl273(:,5), '+g', _t, _crap(:,5), '-g');
plot (plotcfat, 1, Perl273(:,1), Perl273(:,6), '+g', _t, _cfat(:,5), '-g');

set @preference=BackslashEscapes
pltscript(plotcart, "Chart.Header.Text = \"Perleberg et al. (2004) n-Decane Inhalation Study\";")
pltscript(plotcart, "Chart.SubHeader.Text = \"273, 781 or 1200 ppm for 4 Hours\";")
pltscript(plotcart, "Chart.SubHeader.Visible=true;")
pltscript(plotcart, "Chart.Axes.Left.Automatic=false;")
pltscript(plotcart, "Chart.Axes.Left.Minimum=0.01;")
pltscript(plotcart, "Chart.Axes.Left.Maximum=100.0;")
pltscript(plotcart, "Chart.Axes.Left.Logarithmic = true;")
pltscript(plotcart, "Chart.Axes.Left.Title.Text=\"Decane in Arterial Blood [mg/L]\";")
pltscript(plotcart, "Chart.Axes.Bottom.Title.Text=\"Hours\";")
pltscript(plotcart, "Chart.Series[0].Title=\"1200 ppm\";")
pltscript(plotcart, "Chart.Series[1].Title=\"Simulation 1200 ppm\";")
pltscript(plotcart, "Chart.Series[2].Title=\"781 ppm\";")
pltscript(plotcart, "Chart.Series[3].Title=\"Simulation 781 ppm\";")
pltscript(plotcart, "Chart.Series[4].Title=\"273 ppm\";")
pltscript(plotcart, "Chart.Series[5].Title=\"Simulation 273 ppm\";")

pltscript(plotcliv, "Chart.Header.Text = \"Perleberg et al. (2004) n-Decane Inhalation Study\";")
pltscript(plotcliv, "Chart.SubHeader.Text = \"273, 781 or 1200 ppm for 4 Hours\";")
pltscript(plotcliv, "Chart.SubHeader.Visible=true;")
pltscript(plotcliv, "Chart.Axes.Left.Automatic=false;")
pltscript(plotcliv, "Chart.Axes.Left.Minimum=0.01;")
pltscript(plotcliv, "Chart.Axes.Left.Maximum=100.0;")
pltscript(plotcliv, "Chart.Axes.Left.Logarithmic = true;")
pltscript(plotcliv, "Chart.Axes.Left.Title.Text=\"Decane in Liver [mg/L]\";")

```

```

pltscript(plotcliv, "Chart.Axes.Bottom.Title.Text=\"Hours\";")
pltscript(plotcliv, "Chart.Series[0].Title=\"1200 ppm\";")
pltscript(plotcliv, "Chart.Series[1].Title=\"Simulation 1200 ppm\";")
pltscript(plotcliv, "Chart.Series[2].Title=\"781 ppm\";")
pltscript(plotcliv, "Chart.Series[3].Title=\"Simulation 781 ppm\";")
pltscript(plotcliv, "Chart.Series[4].Title=\"273 ppm\";")
pltscript(plotcliv, "Chart.Series[5].Title=\"Simulation 273 ppm\";")

pltscript(plotcbrntot, "Chart.Header.Text = \"Perleberg et al. (2004) n-Decane Inhalation Study\";")
pltscript(plotcbrntot, "Chart.SubHeader.Text = \"273, 781 or 1200 ppm for 4 Hours\";")
pltscript(plotcbrntot, "Chart.SubHeader.Visible=true;")
pltscript(plotcbrntot, "Chart.Axes.Left.Automatic=false;")
pltscript(plotcbrntot, "Chart.Axes.Left.Minimum=0.01;")
pltscript(plotcbrntot, "Chart.Axes.Left.Maximum=200.0;")
pltscript(plotcbrntot, "Chart.Axes.Left.Logarithmic = true;")
pltscript(plotcbrntot, "Chart.Axes.Left.Title.Text=\"Decane in Total Brain [mg/L]\";")
pltscript(plotcbrntot, "Chart.Axes.Bottom.Title.Text=\"Hours\";")
pltscript(plotcbrntot, "Chart.Series[0].Title=\"1200 ppm\";")
pltscript(plotcbrntot, "Chart.Series[1].Title=\"Simulation 1200 ppm\";")
pltscript(plotcbrntot, "Chart.Series[2].Title=\"781 ppm\";")
pltscript(plotcbrntot, "Chart.Series[3].Title=\"Simulation 781 ppm\";")
pltscript(plotcbrntot, "Chart.Series[4].Title=\"273 ppm\";")
pltscript(plotcbrntot, "Chart.Series[5].Title=\"Simulation 273 ppm\";")

pltscript(plotcrap, "Chart.Header.Text = \"Perleberg et al. (2004) n-Decane Inhalation Study\";")
pltscript(plotcrap, "Chart.SubHeader.Text = \"273, 781 or 1200 ppm for 4 Hours\";")
pltscript(plotcrap, "Chart.SubHeader.Visible=true;")
pltscript(plotcrap, "Chart.Axes.Left.Automatic=false;")
pltscript(plotcrap, "Chart.Axes.Left.Minimum=0.01;")
pltscript(plotcrap, "Chart.Axes.Left.Maximum=100.0;")
pltscript(plotcrap, "Chart.Axes.Left.Logarithmic = true;")
pltscript(plotcrap, "Chart.Axes.Left.Title.Text=\"Decane in Rapidly Perfused Tissues [mg/L]\";")
pltscript(plotcrap, "Chart.Axes.Bottom.Title.Text=\"Hours\";")
pltscript(plotcrap, "Chart.Series[0].Title=\"1200 ppm\";")
pltscript(plotcrap, "Chart.Series[1].Title=\"Simulation 1200 ppm\";")
pltscript(plotcrap, "Chart.Series[2].Title=\"781 ppm\";")
pltscript(plotcrap, "Chart.Series[3].Title=\"Simulation 781 ppm\";")
pltscript(plotcrap, "Chart.Series[4].Title=\"273 ppm\";")
pltscript(plotcrap, "Chart.Series[5].Title=\"Simulation 273 ppm\";")

pltscript(plotcfat, "Chart.Header.Text = \"Perleberg et al. (2004) n-Decane Inhalation Study\";")
pltscript(plotcfat, "Chart.SubHeader.Text = \"273, 781 or 1200 ppm for 4 Hours\";")
pltscript(plotcfat, "Chart.SubHeader.Visible=true;")
pltscript(plotcfat, "Chart.Axes.Left.Logarithmic = true;")
pltscript(plotcfat, "Chart.Axes.Left.Title.Text=\"Decane in Fat [mg/L]\";")
pltscript(plotcfat, "Chart.Axes.Bottom.Title.Text=\"Hours\";")
pltscript(plotcfat, "Chart.Series[0].Title=\"1200 ppm\";")
pltscript(plotcfat, "Chart.Series[1].Title=\"Simulation 1200 ppm\";")
pltscript(plotcfat, "Chart.Series[2].Title=\"781 ppm\";")
pltscript(plotcfat, "Chart.Series[3].Title=\"Simulation 781 ppm\";")
pltscript(plotcfat, "Chart.Series[4].Title=\"273 ppm\";")
pltscript(plotcfat, "Chart.Series[5].Title=\"Simulation 273 ppm\";")
set @preference=NoBackslashEscapes

```

## C6\_NTP00\_Rat\_RepeatInh\_2wk.m

```

% NTP. 2000. NTP Technical Report on the Toxicology and Carcinogenesis Studies of Naphthalene
% (CAS NO. 91-20-3) in F344/N Rats. National Toxicology Program, Research Triangle Park NC. NTP TR 500.

% Sprague-Dawley rats, n = 3 male or female (if n=1, no SE info)
% 10, 30, or 60 ppm
% 6 hr/d, 5 d/wk, 2 week timepoint
% Chambers were allowed to empty for 12 min to reduce the concentration enough to remove the rats
% Therefore TChng = 6.1
% (adding 6 min of full exposure to average out 12 minutes of exposure decrease from full to 10%)
% BW data from 1 & 4 weeks (Table 4&5) used to calculate rough 2 wk BW of 0.169 kg male & 0.121 kg female

% Time, CVen for 10, 30, 60 ppm after day 12 exposures ended
% Values, top to bottom, are series of average, -SE, +SE in mg/L (females flip to +SE, -SE)

```

```

MBlood = [
    270.10    0.331    1.540    3.730
    270.10    0.299    1.473    3.525

```

---

```

270.10    0.363    1.607    3.935
270.60    0.192    0.765    1.640
270.60    0.177    0.724    1.590
270.60    0.207    0.806    1.690
271.10    0.118    NaN      NaN
271.10    0.111    NaN      NaN
271.10    0.125    NaN      NaN
271.60    NaN      0.210    0.544
271.60    NaN      0.190    0.488
271.60    NaN      0.230    0.600
272.10    0.045    NaN      NaN
275.10    0.015    0.047    NaN
275.10    0.011    0.043    NaN
275.10    0.019    0.051    NaN
276.10    NaN      NaN      0.069
276.10    NaN      NaN      0.066
276.10    NaN      NaN      0.072
278.10    NaN      0.020    NaN
278.10    NaN      0.016    NaN
278.10    NaN      0.024    NaN
282.10    NaN      0.007    0.022
282.10    NaN      0.007    0.019
282.10    NaN      0.007    0.025
286.10    NaN      NaN      0.008
286.10    NaN      NaN      0.006
286.10    NaN      NaN      0.010];

FBlood = [
270.1    0.241 1.137 2.910
270.1    0.254 1.159 2.950
270.1    0.228 1.115 2.870
270.6    0.130 0.606 1.193
270.6    0.154 0.617 1.320
270.6    0.106 0.595 1.066
271.1    0.102 NaN     NaN
271.1    0.104 NaN     NaN
271.1    0.100 NaN     NaN
271.6    NaN     0.200 0.515
271.6    NaN     0.227 0.525
271.6    NaN     0.173 0.505
272.1    0.043 NaN     NaN
272.1    0.045 NaN     NaN
272.1    0.041 NaN     NaN
275.1    0.010 0.049 NaN
275.1    0.011 0.052 NaN
275.1    0.009 0.046 NaN
276.1    NaN     NaN 0.087
270.1    NaN     NaN 0.104
270.1    NaN     NaN 0.070
278.1    0.026 0.016 NaN
278.1    NaN     0.018 NaN
278.1    NaN     0.014 NaN
282.1    NaN     0.008 0.006
282.1    NaN     NaN 0.007
282.1    NaN     NaN 0.005
286.1    NaN     NaN 0.011];

ResetDoses
Rattus
Rat_6HCs

% Study specific male rat
BW=0.169; CONC(6)=10.0; TCHNG=6.0; DOSEINT=24.0; DAYSWK=5.0; TMAX=270.0; TSTART=0.0; TSTOP=290.0;

% These do not equal the upregulated VMax values in Merrill et al. 2019 but are similar
VMAXC(6)=VMAXC(6)*1.4;
VMAXLNGC(6)=VMAXLNGC(6)*1.12;

% Increased VMaxC values due to metabolic upregulation
% KM = KMLng = 2.18

start @NoCallback
plotcvenm = plot (0, MBlood(:,1), MBlood(:,2), '+b', _t, _cven(:,6), '-b');
plotcvenmlo = plot (0, MBlood(:,1), MBlood(:,2), '+b', _t, _cven(:,6), '-b');

CONC(6)=30.0;

```

```

start @NoCallback
plot (plotcvenm, 1, MBlood(:,1), MBlood(:,3), '+g', _t, _cven(:,6), '-g');

CONC(6)=60.0;
start @NoCallback
plot (plotcvenm, 1, MBlood(:,1), MBlood(:,4), '+m', _t, _cven(:,6), '-m');

% Study specific female rat
BW=0.121; CONC(6)=10.0;
VMAXC(6)=(8.28/(BW^0.75))*BW*1.4;
VMAXLNGC(6)=(0.45/(BW^0.75))*BW*1.12;

start @NoCallback
plotcvenf = plot (0, FBlood(:,1), FBlood(:,2), '+b', _t, _cven(:,6), '-b');
plotcvenflo = plot (0, FBlood(:,1), FBlood(:,2), '+b', _t, _cven(:,6), '-b');

CONC(6)=30.0;
start @NoCallback
plot (plotcvenf, 1, FBlood(:,1), FBlood(:,3), '+g', _t, _cven(:,6), '-g');

CONC(6)=60.0;
start @NoCallback
plot (plotcvenf, 1, FBlood(:,1), FBlood(:,4), '+m', _t, _cven(:,6), '-m');

set @preference=BackslashEscapes
    plotscript(plotcvenm, "Chart.Header.Text = \"NTP (2000) Naphthalene Inhalation Exposure in Male Rats at 2
Wks\";")
    plotscript(plotcvenm, "Chart.Axes.Left.Title.Text=\"Venous Concentration (mg/L)\";")
    plotscript(plotcvenm, "Chart.Axes.Bottom.Title.Text=\"Hours\";")
    plotscript(plotcvenm, "Chart.Series[0].Title=\"10 ppm\";")
    plotscript(plotcvenm, "Chart.Series[1].Title=\"10 ppm Prediction\";")
    plotscript(plotcvenm, "Chart.Series[2].Title=\"30 ppm\";")
    plotscript(plotcvenm, "Chart.Series[3].Title=\"30 ppm Prediction\";")
    plotscript(plotcvenm, "Chart.Series[4].Title=\"60 ppm\";")
    plotscript(plotcvenm, "Chart.Series[5].Title=\"60 ppm Prediction\";")

    plotscript(plotcvenmlo, "Chart.Header.Text = \"NTP (2000) Naphthalene Inhalation Exposure in MaleRats at 2
Wks\";")
    plotscript(plotcvenmlo, "Chart.Axes.Left.Title.Text=\"Venous Concentration (mg/L)\";")
    plotscript(plotcvenmlo, "Chart.Axes.Bottom.Title.Text=\"Hours\";")
    plotscript(plotcvenmlo, "Chart.Series[0].Title=\"10 ppm\";")
    plotscript(plotcvenmlo, "Chart.Series[1].Title=\"10 ppm Prediction\";")

    plotscript(plotcvenf, "Chart.Header.Text = \"NTP (2000) Naphthalene Inhalation Exposure in Male Rats at 2
Wks\";")
    plotscript(plotcvenf, "Chart.Axes.Left.Title.Text=\"Venous Concentration (mg/L)\";")
    plotscript(plotcvenf, "Chart.Axes.Bottom.Title.Text=\"Hours\";")
    plotscript(plotcvenf, "Chart.Series[0].Title=\"10 ppm\";")
    plotscript(plotcvenf, "Chart.Series[1].Title=\"10 ppm Prediction\";")
    plotscript(plotcvenf, "Chart.Series[2].Title=\"30 ppm\";")
    plotscript(plotcvenf, "Chart.Series[3].Title=\"30 ppm Prediction\";")
    plotscript(plotcvenf, "Chart.Series[4].Title=\"60 ppm\";")
    plotscript(plotcvenf, "Chart.Series[5].Title=\"60 ppm Prediction\";")

    plotscript(plotcvenflo, "Chart.Header.Text = \"NTP (2000) Naphthalene Inhalation Exposure in MaleRats at 2
Wks\";")
    plotscript(plotcvenflo, "Chart.Axes.Left.Title.Text=\"Venous Concentration (mg/L)\";")
    plotscript(plotcvenflo, "Chart.Axes.Bottom.Title.Text=\"Hours\";")
    plotscript(plotcvenflo, "Chart.Series[0].Title=\"10 ppm\";")
    plotscript(plotcvenflo, "Chart.Series[1].Title=\"10 ppm Prediction\";")
set @preference=NoBackslashEscapes

```

## C6\_NTP00\_MFRat\_SingleInh.m

```

% NTP. 2000. NTP Technical Report on the Toxicology and Carcinogenesis Studies of Naphthalene
% (CAS NO. 91-20-3) in F344/N Rats. National Toxicology Program, Research Triangle Park NC. NTP TR 500.

% Sprague-Dawley rats, n = 3 males or females
% 10, 30, or 60 ppm
% 6 hr single exposure
% Chambers were allowed to empty for 12 min to reduce the concentration enough to remove the rats
% Therefore TChng = 6.1
% (adding 6 min of full exposure to average out 12 minutes of exposure decrease from full to 10%)
% BW data from Table D5: Male = 125 g, Female = 100 g

```

---

```

% Time, CVen for 10, 30, 60 ppm single dose after 6.1 hours of exposure
% Values, top to bottom, are series of average, -SE, +SE in mg/L
MBlood = [
    6.1    0.463    1.387    5.360
    6.1    0.497    1.439    6.026
    6.1    0.429    1.335    4.694
    6.6    0.308    0.911    3.193
    6.6    0.317    0.962    3.529
    6.6    0.299    0.860    2.857
    7.1    0.171    0.661    2.227
    7.1    0.179    0.720    2.615
    7.1    0.163    0.602    1.839
    7.6    0.094    0.476    1.143
    7.6    0.103    0.494    1.399
    7.6    0.085    0.458    0.887
    8.1    0.100    0.239    0.838
    8.1    0.111    0.267    0.987
    8.1    0.089    0.211    0.689
    10.1   0.051    0.138    0.380
    10.1   0.053    0.145    0.422
    10.1   0.049    0.131    0.338
    12.1   0.029    0.071    0.252
    12.1   0.030    0.072    0.261
    12.1   0.028    0.070    0.243
    14.1   0.014    0.060    0.174
    14.1   0.017    0.063    0.197
    14.1   0.011    0.057    0.151];

FBlood = [
    6.1 0.442 1.667 4.850
    6.1 0.471 1.824 4.962
    6.1 0.413 1.510 4.738
    6.6 0.243 0.841 2.483
    6.6 0.250 0.927 2.625
    6.6 0.236 0.755 2.341
    7.1 0.135 0.632 1.610
    7.1 0.143 0.697 1.896
    7.1 0.127 0.567 1.324
    7.6 0.087 0.397 0.870
    7.6 0.101 0.443 1.028
    7.6 0.073 0.351 0.712
    8.1 0.101 0.408 0.868
    8.1 0.115 0.439 0.940
    8.1 0.087 0.377 0.796
    10.1 0.050 0.182 0.428
    10.1 0.057 0.198 0.506
    10.1 0.043 0.166 0.350
    12.1 0.034 0.100 0.312
    12.1 0.039 0.119 0.332
    12.1 0.029 0.081 0.292
    14.1 0.016 0.069 0.192
    14.1 0.022 0.078 0.219
    14.1 0.010 0.060 0.165];

ResetDoses
Rattus
Rat_6HCs

% Study specific male rat
BW=0.125; CONC(6)=10.0; TCHNG=6.0; DOSEINT=24.0; DAYSWK=5.0; TMAX=24.0; TSTART=0.0; TSTOP=24.0;
start @NoCallback
plotcvenm = plot (0, MBlood(:,1), MBlood(:,2), '+b', _t, _cven(:,6), '-b');
plotcvenml = plot (0, MBlood(:,1), MBlood(:,2), '+b', _t, _cven(:,6), '-b');

CONC(6)=30.0;
start @NoCallback
plot (plotcvenm, 1, MBlood(:,1), MBlood(:,3), '+g', _t, _cven(:,6), '-g');

CONC(6)=60.0;
start @NoCallback
plot (plotcvenm, 1, MBlood(:,1), MBlood(:,4), '+m', _t, _cven(:,6), '-m');

% Study specific female rat
BW=0.1; CONC(6)=10.0;

```

```

VMAXC(6)=( (8.28/(BW^0.75))*BW);
VMAXLNGC(6)=( (0.45/(BW^0.75))*BW);
start @NoCallback
plotcvenf = plot (0, FBlood(:,1), FBlood(:,2), '+b', _t, _cven(:,6), '-b');
plotcvenflo = plot (0, FBlood(:,1), FBlood(:,2), '+b', _t, _cven(:,6), '-b');

CONC(6)=30.0;
start @NoCallback
plot (plotcvenf, 1, FBlood(:,1), FBlood(:,3), '+g', _t, _cven(:,6), '-g');

CONC(6)=60.0;
start @NoCallback
plot (plotcvenf, 1, FBlood(:,1), FBlood(:,4), '+m', _t, _cven(:,6), '-m');

set @preference=BackslashEscapes
pltscript(plotcvenm, "Chart.Header.Text = \"NTP (2000) Naphthalene Single Inhalation Exposure in Male
Rats\";")
pltscript(plotcvenm, "Chart.Axes.Left.Title.Text=\"Venous Concentration (mg/L)\";")
pltscript(plotcvenm, "Chart.Axes.Bottom.Title.Text=\"Hours\";")
pltscript(plotcvenm, "Chart.Series[0].Title=\"10 ppm\";")
pltscript(plotcvenm, "Chart.Series[1].Title=\"10 ppm Prediction\";")
pltscript(plotcvenm, "Chart.Series[2].Title=\"30 ppm\";")
pltscript(plotcvenm, "Chart.Series[3].Title=\"30 ppm Prediction\";")
pltscript(plotcvenm, "Chart.Series[4].Title=\"60 ppm\";")
pltscript(plotcvenm, "Chart.Series[5].Title=\"60 ppm Prediction\";")

pltscript(plotcvenmlo, "Chart.Header.Text = \"NTP (2000) Naphthalene Single Inhalation Exposure in Male
Rats\";")
pltscript(plotcvenmlo, "Chart.Axes.Left.Title.Text=\"Venous Concentration (mg/L)\";")
pltscript(plotcvenmlo, "Chart.Axes.Bottom.Title.Text=\"Hours\";")
pltscript(plotcvenmlo, "Chart.Series[0].Title=\"10 ppm\";")
pltscript(plotcvenmlo, "Chart.Series[1].Title=\"10 ppm Prediction\";")

pltscript(plotcvenf, "Chart.Header.Text = \"NTP (2000) Naphthalene Single Inhalation Exposure in Female
Rats\";")
pltscript(plotcvenf, "Chart.Axes.Left.Title.Text=\"Venous Concentration (mg/L)\";")
pltscript(plotcvenf, "Chart.Axes.Bottom.Title.Text=\"Hours\";")
pltscript(plotcvenf, "Chart.Series[0].Title=\"10 ppm\";")
pltscript(plotcvenf, "Chart.Series[1].Title=\"10 ppm Prediction\";")
pltscript(plotcvenf, "Chart.Series[2].Title=\"30 ppm\";")
pltscript(plotcvenf, "Chart.Series[3].Title=\"30 ppm Prediction\";")
pltscript(plotcvenf, "Chart.Series[4].Title=\"60 ppm\";")
pltscript(plotcvenf, "Chart.Series[5].Title=\"60 ppm Prediction\";")

pltscript(plotcvenflo, "Chart.Header.Text = \"NTP (2000) Naphthalene Single Inhalation Exposure in Female
Rats\";")
pltscript(plotcvenflo, "Chart.Axes.Left.Title.Text=\"Venous Concentration (mg/L)\";")
pltscript(plotcvenflo, "Chart.Axes.Bottom.Title.Text=\"Hours\";")
pltscript(plotcvenflo, "Chart.Series[0].Title=\"10 ppm\";")
pltscript(plotcvenflo, "Chart.Series[1].Title=\"10 ppm Prediction\";")
set @preference=NoBackslashEscapes

```

## C6\_RTI96\_Rat\_IV.m

```

% Simulates data from RTI 1996
% SE and individual data are available
% Data used in publications by Quick and Shuler (1999),
% Willems et al. (2001), Campbell et al. (2014).

```

```

% male rats, 1, 3 and 10 mg/kg, time and mean cvenbldna
Male=[
0.03 1.980 3.580 9.330
0.03 3.080 8.280 11.030
0.03 0.880 0.000 7.630
0.08 0.668 2.310 5.050
0.08 0.707 4.610 6.150
0.08 0.629 0.010 3.950
0.17 0.322 2.120 2.700
0.17 0.337 3.920 2.830
0.17 0.307 0.320 2.570
0.33 0.106 0.720 0.787
0.33 0.128 1.250 0.897
0.33 0.084 0.190 0.677

```



---

```

0.67    0.039    0.245    0.447
0.67    0.059    0.312    0.487
0.67    0.019    0.178    0.407
1.00    0.338    0.158    0.186
1.00    0.341    0.180    0.210
1.00    0.335    0.136    0.162
2.00    0.017    0.123    0.086
2.00    NaN      0.220    0.093
2.00    NaN      0.026    0.078
4.00    0.014    0.053    0.048
4.00    NaN      0.101    0.058
4.00    NaN      0.005    0.038
6.00    0.011    0.091    0.036
6.00    NaN      NaN      0.039
6.00    NaN      NaN      0.032
8.00    0.007    0.021    0.014
8.00    NaN      NaN      0.018
8.00    NaN      NaN      0.010];

% female rats, 1, 3 or 10 mg/kg, time and mean cvenbldna
Fem=[
0.03    1.030    4.140    10.200
0.03    1.930    6.440    12.300
0.03    0.130    1.840    8.100
0.08    0.457    2.100    6.130
0.08    0.827    2.850    9.530
0.08    0.087    1.350    2.730
0.17    0.209    1.780    2.220
0.17    0.409    2.880    2.640
0.17    0.009    0.680    1.800
0.33    0.057    0.457    0.860
0.33    0.112    0.535    1.090
0.33    0.002    0.379    0.630
0.67    0.029    0.179    0.333
0.67    0.046    0.251    0.414
0.67    0.012    0.107    0.252
1.00    0.018    0.108    0.211
1.00    0.022    0.139    0.234
1.00    0.013    0.077    0.188
2.00    0.013    0.047    0.092
2.00    0.020    0.058    0.104
2.00    0.005    0.036    0.080
4.00    0.014    0.022    0.061
4.00    0.021    0.032    0.064
4.00    0.007    0.012    0.058
6.00    0.016    0.026    0.050
6.00    0.027    0.028    0.056
6.00    0.005    0.024    0.045
8.00    0.011    0.024    0.029
8.00    NaN      NaN      0.031
8.00    NaN      NaN      0.027];

ResetDoses
Rattus
Rat_6HCs

% MALE SIMULATIONS
% 1 mg/kg
BW=0.255; IVDOSE(6)=1.0; TINF=0.008, TSTOP=8.0;
start @nocallback
plotcven = plot (0, Male(:,1), Male(:,2), '+b', _t, _cven(:,6), '-b');
plotcvenlo = plot (0, Male(:,1), Male(:,2), '+b', _t, _cven(:,6), '-b');

% 3 mg/kg
IVDOSE(6)=3.0;
start @nocallback
plot (plotcven, 1, Male(:,1), Male(:,3), '+g', _t, _cven(:,6), '-g');

% 10 mg/kg
IVDOSE(6)=10.0;
start @nocallback
plot (plotcven, 1, Male(:,1), Male(:,4), '+m', _t, _cven(:,6), '-m');

```

```

% FEMALE SIMULATIONS
% 1 mg/kg
BW=0.156; IVDOSE(6)=1.0; TINF=0.008, TSTOP=8.0;
VMAXC(6)=( (8.28/(BW^0.75))*BW);
VMAXLNGC(6)=( (0.45/(BW^0.75))*BW);
start @nocallback
plotcvenf = plot (0, Fem(:,1), Fem(:,2), '+b', _t, _cven(:,6), '-b');
plotcvenflo = plot (0, Fem(:,1), Fem(:,2), '+b', _t, _cven(:,6), '-b');

% 3 mg/kg
IVDOSE(6)=3.0;
start @nocallback
plot (plotcvenf, 1, Fem(:,1), Fem(:,3), '+g', _t, _cven(:,6), '-g');

% 10 mg/kg
IVDOSE(6)=10.0;
start @nocallback
plot (plotcvenf, 1, Fem(:,1), Fem(:,4), '+m', _t, _cven(:,6), '-m');

set @preference=BackslashEscapes
pltscript(plotcven, "Chart.Header.Text = \"RTI 1996 IV Study delivered to NTP - Male Rats\";")
pltscript(plotcven, "Chart.Axes.Left.LogarithmicBase=10;")
pltscript(plotcven, "Chart.Axes.Left.Logarithmic=true;")
pltscript(plotcven, "Chart.Axes.LeftAutomatic=false;")
pltscript(plotcven, "Chart.Axes.Left.Minimum=0.001;")
pltscript(plotcven, "Chart.Axes.Left.Maximum=100.0;")
pltscript(plotcven, "Chart.Axes.Left.Title.Text=\"Venous Concentration (mg/L)\";")
pltscript(plotcven, "Chart.Axes.Bottom.Title.Text=\"Hours\";")
pltscript(plotcven, "Chart.Series[0].Title=\"1 mg/kg Simulation\";")
pltscript(plotcven, "Chart.Series[1].Title=\"1 mg/kg Data\";")
pltscript(plotcven, "Chart.Series[2].Title=\"3 mg/kg Simulation\";")
pltscript(plotcven, "Chart.Series[3].Title=\"3 mg/kg Data\";")
pltscript(plotcven, "Chart.Series[4].Title=\"10 mg/kg Simulation\";")
pltscript(plotcven, "Chart.Series[5].Title=\"10 mg/kg Data\";")

pltscript(plotcvenlo, "Chart.Header.Text = \"RTI 1996 IV Study delivered to NTP - Male Rats\";")
pltscript(plotcvenlo, "Chart.Axes.Left.LogarithmicBase=10;")
pltscript(plotcvenlo, "Chart.Axes.Left.Logarithmic=true;")
pltscript(plotcvenlo, "Chart.Axes.LeftAutomatic=false;")
pltscript(plotcvenlo, "Chart.Axes.Left.Minimum=0.001;")
pltscript(plotcvenlo, "Chart.Axes.Left.Maximum=100.0;")
pltscript(plotcvenlo, "Chart.Axes.Left.Title.Text=\"Venous Concentration (mg/L)\";")
pltscript(plotcvenlo, "Chart.Axes.Bottom.Title.Text=\"Hours\";")
pltscript(plotcvenlo, "Chart.Series[0].Title=\"1 mg/kg Simulation\";")
pltscript(plotcvenlo, "Chart.Series[1].Title=\"1 mg/kg Data\";")

pltscript(plotcvenf, "Chart.Header.Text = \"RTI 1996 IV Study delivered to NTP - Female Rats\";")
pltscript(plotcvenf, "Chart.Axes.Left.LogarithmicBase=10;")
pltscript(plotcvenf, "Chart.Axes.Left.Logarithmic=true;")
pltscript(plotcvenf, "Chart.Axes.LeftAutomatic=false;")
pltscript(plotcvenf, "Chart.Axes.Left.Minimum=0.001;")
pltscript(plotcvenf, "Chart.Axes.Left.Maximum=100.0;")
pltscript(plotcvenf, "Chart.Axes.Left.Title.Text=\"Venous Concentration (mg/L)\";")
pltscript(plotcvenf, "Chart.Axes.Bottom.Title.Text=\"Hours\";")
pltscript(plotcvenf, "Chart.Series[0].Title=\"1 mg/kg Simulation\";")
pltscript(plotcvenf, "Chart.Series[1].Title=\"1 mg/kg Data\";")
pltscript(plotcvenf, "Chart.Series[2].Title=\"3 mg/kg Simulation\";")
pltscript(plotcvenf, "Chart.Series[3].Title=\"3 mg/kg Data\";")
pltscript(plotcvenf, "Chart.Series[4].Title=\"10 mg/kg Simulation\";")
pltscript(plotcvenf, "Chart.Series[5].Title=\"10 mg/kg Data\";")

pltscript(plotcvenflo, "Chart.Header.Text = \"RTI 1996 IV Study delivered to NTP - Female Rats\";")
pltscript(plotcvenflo, "Chart.Axes.Left.LogarithmicBase=10;")
pltscript(plotcvenflo, "Chart.Axes.Left.Logarithmic=true;")
pltscript(plotcvenflo, "Chart.Axes.LeftAutomatic=false;")
pltscript(plotcvenflo, "Chart.Axes.Left.Minimum=0.001;")
pltscript(plotcvenflo, "Chart.Axes.Left.Maximum=100.0;")
pltscript(plotcvenflo, "Chart.Axes.Left.Title.Text=\"Venous Concentration (mg/L)\";")
pltscript(plotcvenflo, "Chart.Axes.Bottom.Title.Text=\"Hours\";")
pltscript(plotcvenflo, "Chart.Series[0].Title=\"1 mg/kg Simulation\";")
pltscript(plotcvenflo, "Chart.Series[1].Title=\"1 mg/kg Data\";")
set @preference=NoBackslashEscapes

```

## 5. Guthrie *et al.* Prediction .m File

This .m file was used to produce Figure 5 in the main article.

### Predict\_Guthrie14\_scaled.m

```
% Simulates 6 key hydrocarbons for Guthrie et al. 2014 exposure to predict rat target tissue concentrations

% Guthrie, O.W., Xu, H., Wong, B.A., McInturf, S.M., Reboulet, J.E., Ortiz, P.A. and Mattie, D.R. 2014.
%   Exposure to low levels of jet-propulsion fuel impairs brainstem encoding of stimulus intensity.
%   J Toxicol Environ Health A 77(5): 261-280.

ResetDoses
Rattus
Rat_6HCs

% Calculates concentration of each component in POSF 4658, converted from 1000 mg/m3 to ppm, assuming STP
% Weight percent values from tandem gas chromatography analysis by the 2006 Shafer et al. method
% POSF 4658 contains 0.16 percent toluene, 0.11 percent ethylbenzene,
%   0.67 percent xylenes, 1.14 percent nonane, 2.55 percent decane, 0.12% naphthalene
%   File name: JPC5 Fuels Comparison-Reanalysis Version.xlsx
% Average starting BW in Guthrie et al. 2014
% Simulates 1 day of 4 week study
BW=0.105; TCHNG=6.0; TSTOP=12.0;
CONC(1)=((0.0016*1000)*24.45)/MW(1);
CONC(2)=((0.0011*1000)*24.45)/MW(2);
CONC(3)=((0.0067*1000)*24.45)/MW(3);
CONC(4)=((0.0114*1000)*24.45)/MW(4);
CONC(5)=((0.0255*1000)*24.45)/MW(5);
CONC(6)=((0.0012*1000)*24.45)/MW(6);
start @nocallback
plotcbrnstm = plot (0, _t, _cbrnstm(:,1), '-b', _t, _cbrnstm(:,2), '-k', _t, _cbrnstm(:,3), '-r', _t,
_cbrnstm(:,4), '-g', _t, _cbrnstm(:,5), '-m', _t, _cbrnstm(:,6), '-c');
plotcbrntl = plot (0, _t, _cbrntl(:,1), '-b', _t, _cbrntl(:,2), '-k', _t, _cbrntl(:,3), '-r', _t,
_cbrntl(:,4), '-g', _t, _cbrntl(:,5), '-m', _t, _cbrntl(:,6), '-c');
plotcbrn = plot (0, _t, _cbrn(:,1), '-b', _t, _cbrn(:,2), '-k', _t, _cbrn(:,3), '-r', _t, _cbrn(:,4), '-g',
_t, _cbrn(:,5), '-m', _t, _cbrn(:,6), '-c');
plotccoc = plot (0, _t, _ccoc(:,1), '-b', _t, _ccoc(:,2), '-k', _t, _ccoc(:,3), '-r', _t, _ccoc(:,4), '-g',
_t, _ccoc(:,5), '-m', _t, _ccoc(:,6));
plotcliv = plot (0, _t, _cliv(:,1), '-b', _t, _cliv(:,2), '-k', _t, _cliv(:,3), '-r', _t, _cliv(:,4), '-g',
_t, _cliv(:,5), '-m', _t, _cliv(:,6), '-c');
plotclng = plot (0, _t, _clng(:,1), '-b', _t, _clng(:,2), '-k', _t, _clng(:,3), '-r', _t, _clng(:,4), '-g',
_t, _clng(:,5), '-m', _t, _clng(:,6), '-c');
plotcven = plot (0, _t, _cven(:,1), '-b', _t, _cven(:,2), '-k', _t, _cven(:,3), '-r', _t, _cven(:,4), '-g',
_t, _cven(:,5), '-m', _t, _cven(:,6), '-c');

set @preference=BackslashEscapes
pltscript(plotcbrnstm, "Chart.Header.Text = \"Predictions for Guthrie et al. (2014) Exposure\";")
pltscript(plotcbrnstm, "Chart.SubHeader.Text = \"6 Key Hydrocarbons in JP-8\";")
pltscript(plotcbrnstm, "Chart.SubHeader.Visible=true;")
pltscript(plotcbrnstm, "Chart.Axes.Left.Automatic=false;")
pltscript(plotcbrnstm, "Chart.Axes.Left.Minimum=0.0;")
pltscript(plotcbrnstm, "Chart.Axes.Left.Maximum=0.4;")
pltscript(plotcbrnstm, "Chart.Axes.Left.Title.Text=\"Brain Stem [mg/L]\";")
pltscript(plotcbrnstm, "Chart.Axes.Bottom.Title.Text=\"Hours\";")
pltscript(plotcbrnstm, "Chart.Series[0].Title=\"Toluene\";")
pltscript(plotcbrnstm, "Chart.Series[1].Title=\"Ethylbenzene\";")
pltscript(plotcbrnstm, "Chart.Series[2].Title=\"Xylene\";")
pltscript(plotcbrnstm, "Chart.Series[3].Title=\"Nonane\";")
pltscript(plotcbrnstm, "Chart.Series[4].Title=\"Decane\";")
pltscript(plotcbrnstm, "Chart.Series[5].Title=\"Naphthalene\";")

pltscript(plotcbrntl, "Chart.Header.Text = \"Predictions for Guthrie et al. (2014) Exposure\";")
pltscript(plotcbrntl, "Chart.SubHeader.Text = \"6 Key Hydrocarbons in JP-8\";")
pltscript(plotcbrntl, "Chart.SubHeader.Visible=true;")
pltscript(plotcbrntl, "Chart.Axes.Left.Automatic=false;")
pltscript(plotcbrntl, "Chart.Axes.Left.Minimum=0.0;")
pltscript(plotcbrntl, "Chart.Axes.Left.Maximum=0.4;")
pltscript(plotcbrntl, "Chart.Axes.Left.Title.Text=\"Temporal Lobe [mg/L]\";")
pltscript(plotcbrntl, "Chart.Axes.Bottom.Title.Text=\"Hours\";")
pltscript(plotcbrntl, "Chart.Series[0].Title=\"Toluene\";")
pltscript(plotcbrntl, "Chart.Series[1].Title=\"Ethylbenzene\";")
pltscript(plotcbrntl, "Chart.Series[2].Title=\"Xylene\";")
pltscript(plotcbrntl, "Chart.Series[3].Title=\"Nonane\";")
```

```

pltscript(plotcbrntl, "Chart.Series[4].Title=\"Decane\";")
pltscript(plotcbrntl, "Chart.Series[5].Title=\"Naphthalene\";")

pltscript(plotcbrn, "Chart.Header.Text = \"Predictions for Guthrie et al. (2014) Exposure\";")
pltscript(plotcbrn, "Chart.SubHeader.Text = \"6 Key Hydrocarbons in JP-8\";")
pltscript(plotcbrn, "Chart.SubHeader.Visible=true;")
pltscript(plotcbrn, "Chart.Axes.Left.Automatic=false;")
pltscript(plotcbrn, "Chart.Axes.Left.Minimum=0.0;")
pltscript(plotcbrn, "Chart.Axes.Left.Maximum=0.4;")
pltscript(plotcbrn, "Chart.Axes.Left.Title.Text=\"Remainder of the Brain [mg/L]\";")
pltscript(plotcbrn, "Chart.Axes.Bottom.Title.Text=\"Hours\";")
pltscript(plotcbrn, "Chart.Series[0].Title=\"Toluene\";")
pltscript(plotcbrn, "Chart.Series[1].Title=\"Ethylbenzene\";")
pltscript(plotcbrn, "Chart.Series[2].Title=\"Xylene\";")
pltscript(plotcbrn, "Chart.Series[3].Title=\"Nonane\";")
pltscript(plotcbrn, "Chart.Series[4].Title=\"Decane\";")
pltscript(plotcbrn, "Chart.Series[5].Title=\"Naphthalene\";")

pltscript(plotccoc, "Chart.Header.Text = \"Predictions for Guthrie et al. (2014) Exposure\";")
pltscript(plotccoc, "Chart.SubHeader.Text = \"6 Key Hydrocarbons in JP-8\";")
pltscript(plotccoc, "Chart.SubHeader.Visible=true;")
pltscript(plotccoc, "Chart.Axes.Left.Automatic=false;")
pltscript(plotccoc, "Chart.Axes.Left.Minimum=0.0;")
pltscript(plotccoc, "Chart.Axes.Left.Maximum=0.4;")
pltscript(plotccoc, "Chart.Axes.Left.Title.Text=\"Cochlea [mg/L]\";")
pltscript(plotccoc, "Chart.Axes.Bottom.Title.Text=\"Hours\";")
pltscript(plotccoc, "Chart.Series[0].Title=\"Toluene\";")
pltscript(plotccoc, "Chart.Series[1].Title=\"Ethylbenzene\";")
pltscript(plotccoc, "Chart.Series[2].Title=\"Xylene\";")
pltscript(plotccoc, "Chart.Series[3].Title=\"Nonane\";")
pltscript(plotccoc, "Chart.Series[4].Title=\"Decane\";")
pltscript(plotccoc, "Chart.Series[5].Title=\"Naphthalene\";")

pltscript(plotcliv, "Chart.Header.Text = \"Predictions for Guthrie et al. (2014) Exposure\";")
pltscript(plotcliv, "Chart.SubHeader.Text = \"6 Key Hydrocarbons in JP-8\";")
pltscript(plotcliv, "Chart.SubHeader.Visible=true;")
pltscript(plotcliv, "Chart.Axes.Left.Automatic=false;")
pltscript(plotcliv, "Chart.Axes.Left.Minimum=0.0;")
pltscript(plotcliv, "Chart.Axes.Left.Maximum=0.4;")
pltscript(plotcliv, "Chart.Axes.Left.Title.Text=\"Liver [mg/L]\";")
pltscript(plotcliv, "Chart.Axes.Bottom.Title.Text=\"Hours\";")
pltscript(plotcliv, "Chart.Series[0].Title=\"Toluene\";")
pltscript(plotcliv, "Chart.Series[1].Title=\"Ethylbenzene\";")
pltscript(plotcliv, "Chart.Series[2].Title=\"Xylene\";")
pltscript(plotcliv, "Chart.Series[3].Title=\"Nonane\";")
pltscript(plotcliv, "Chart.Series[4].Title=\"Decane\";")
pltscript(plotcliv, "Chart.Series[5].Title=\"Naphthalene\";")

pltscript(plotclng, "Chart.Header.Text = \"Predictions for Guthrie et al. (2014) Exposure\";")
pltscript(plotclng, "Chart.SubHeader.Text = \"5 Key Hydrocarbons in JP-8\";")
pltscript(plotclng, "Chart.SubHeader.Visible=true;")
pltscript(plotclng, "Chart.Axes.Left.Automatic=false;")
pltscript(plotclng, "Chart.Axes.Left.Minimum=0.0;")
pltscript(plotclng, "Chart.Axes.Left.Maximum=0.4;")
pltscript(plotclng, "Chart.Axes.Left.Title.Text=\"Lung [mg/L]\";")
pltscript(plotclng, "Chart.Axes.Bottom.Title.Text=\"Hours\";")
pltscript(plotclng, "Chart.Series[0].Title=\"Toluene\";")
pltscript(plotclng, "Chart.Series[1].Title=\"Ethylbenzene\";")
pltscript(plotclng, "Chart.Series[2].Title=\"Xylene\";")
pltscript(plotclng, "Chart.Series[3].Title=\"Nonane\";")
pltscript(plotclng, "Chart.Series[4].Title=\"Decane\";")
pltscript(plotclng, "Chart.Series[5].Title=\"Naphthalene\";")

pltscript(plotcven, "Chart.Header.Text = \"Predictions for Guthrie et al. (2014) Exposure\";")
pltscript(plotcven, "Chart.SubHeader.Text = \"5 Key Hydrocarbons in JP-8\";")
pltscript(plotcven, "Chart.SubHeader.Visible=true;")
pltscript(plotcven, "Chart.Axes.Left.Automatic=false;")
pltscript(plotcven, "Chart.Axes.Left.Minimum=0.0;")
pltscript(plotcven, "Chart.Axes.Left.Maximum=0.4;")
pltscript(plotcven, "Chart.Axes.Left.Title.Text=\"Venous Blood [mg/L]\";")
pltscript(plotcven, "Chart.Axes.Bottom.Title.Text=\"Hours\";")
pltscript(plotcven, "Chart.Series[0].Title=\"Toluene\";")
pltscript(plotcven, "Chart.Series[1].Title=\"Ethylbenzene\";")
pltscript(plotcven, "Chart.Series[2].Title=\"Xylene\";")
pltscript(plotcven, "Chart.Series[3].Title=\"Nonane\";")
pltscript(plotcven, "Chart.Series[4].Title=\"Decane\";")

```

```

pltscript(plotcven, "Chart.Series[5].Title=\"Naphthalene\";")
set @preference=NoBackslashEscapes

```

## 6. Fuels Comparison Prediction .m File

These .m files were used to produce Figures 6-7 in the main article.

### Predict\_RatOEL\_scaled.m

```

% Simulates 6 key hydrocarbons at OEL concentration for jet fuels

ResetDoses
Rattus
Rat_6HCs

% Calculates concentration of each component in POSF 4658, converted from 200 mg/m3 to ppm, assuming STP
% Weight percent values from tandem gas chromatography analysis by the 2006 Shafer et al. method
% POSF 4658 contains 0.16 percent toluene, 0.11 percent ethylbenzene,
% 0.67 percent xylenes, 1.14 percent nonane, 2.55 percent decane, 0.12% naphthalene
% File name: JPC5 Fuels Comparison-Reanalysis Version.xlsx
% Simulates 8 hour work day
BW=0.25; TCHNG=8.0; TSTOP=12.0;
CONC(1)=((0.0016*200.0)*24.45)/MW(1);
CONC(2)=((0.0011*200.0)*24.45)/MW(2);
CONC(3)=((0.0067*200.0)*24.45)/MW(3);
CONC(4)=((0.0114*200.0)*24.45)/MW(4);
CONC(5)=((0.0255*200.0)*24.45)/MW(5);
CONC(6)=((0.0012*200.0)*24.45)/MW(6);
start @nocallback
plotcbrnstm = plot (0, _t, _cbrnstm(:,1), '-b', _t, _cbrnstm(:,2), '-k', _t, _cbrnstm(:,3), '-r', _t,
_cbrnstm(:,4), '-g', _t, _cbrnstm(:,5), '-m', _t, _cbrnstm(:,6), '-c');
plotcbrntl = plot (0, _t, _cbrntl(:,1), '-b', _t, _cbrntl(:,2), '-k', _t, _cbrntl(:,3), '-r', _t,
_cbrntl(:,4), '-g', _t, _cbrntl(:,5), '-m', _t, _cbrntl(:,6), '-c');
plotcbrn = plot (0, _t, _cbrn(:,1), '-b', _t, _cbrn(:,2), '-k', _t, _cbrn(:,3), '-r', _t, _cbrn(:,4), '-g', _t,
_cbrn(:,5), '-m', _t, _cbrn(:,6), '-c');
plotccoc = plot (0, _t, _ccoc(:,1), '-b', _t, _ccoc(:,2), '-k', _t, _ccoc(:,3), '-r', _t, _ccoc(:,4), '-g', _t,
_ccoc(:,5), '-m', _t, _ccoc(:,6), '-c');
plotcliv = plot (0, _t, _cliv(:,1), '-b', _t, _cliv(:,2), '-k', _t, _cliv(:,3), '-r', _t, _cliv(:,4), '-g', _t,
_cliv(:,5), '-m', _t, _cliv(:,6), '-c');
plotclng = plot (0, _t, _clng(:,1), '-b', _t, _clng(:,2), '-k', _t, _clng(:,3), '-r', _t, _clng(:,4), '-g', _t,
_clng(:,5), '-m', _t, _clng(:,6), '-c');
plotcven = plot (0, _t, _cven(:,1), '-b', _t, _cven(:,2), '-k', _t, _cven(:,3), '-r', _t, _cven(:,4), '-g', _t,
_cven(:,5), '-m', _t, _cven(:,6), '-c');

set @preference=BackslashEscapes
pltscript(plotcbrnstm, "Chart.Header.Text = \"Predictions for OEL Exposure - scaled\";")
pltscript(plotcbrnstm, "Chart.SubHeader.Text = \"6 Key Hydrocarbons in JP-8\";")
pltscript(plotcbrnstm, "Chart.SubHeader.Visible=true;")
pltscript(plotcbrnstm, "Chart.Axes.Left.Automatic=false;")
pltscript(plotcbrnstm, "Chart.Axes.Left.Minimum=0.0;")
pltscript(plotcbrnstm, "Chart.Axes.Left.Maximum=0.07;")
pltscript(plotcbrnstm, "Chart.Axes.Left.Title.Text=\"Brain Stem [mg/L]\";")
pltscript(plotcbrnstm, "Chart.Axes.Bottom.Title.Text=\"Hours\";")
pltscript(plotcbrnstm, "Chart.Series[0].Title=\"Toluene\";")
pltscript(plotcbrnstm, "Chart.Series[1].Title=\"Ethylbenzene\";")
pltscript(plotcbrnstm, "Chart.Series[2].Title=\"Xylene\";")
pltscript(plotcbrnstm, "Chart.Series[3].Title=\"Nonane\";")
pltscript(plotcbrnstm, "Chart.Series[4].Title=\"Decane\";")
pltscript(plotcbrnstm, "Chart.Series[5].Title=\"Naphthalene\";")

pltscript(plotcbrntl, "Chart.Header.Text = \"Predictions for OEL Exposure - scaled\";")
pltscript(plotcbrntl, "Chart.SubHeader.Text = \"6 Key Hydrocarbons in JP-8\";")
pltscript(plotcbrntl, "Chart.SubHeader.Visible=true;")
pltscript(plotcbrntl, "Chart.Axes.Left.Automatic=false;")
pltscript(plotcbrntl, "Chart.Axes.Left.Minimum=0.0;")
pltscript(plotcbrntl, "Chart.Axes.Left.Maximum=0.07;")
pltscript(plotcbrntl, "Chart.Axes.Left.Title.Text=\"Temporal Lobe [mg/L]\";")
pltscript(plotcbrntl, "Chart.Axes.Bottom.Title.Text=\"Hours\";")
pltscript(plotcbrntl, "Chart.Series[0].Title=\"Toluene\";")
pltscript(plotcbrntl, "Chart.Series[1].Title=\"Ethylbenzene\";")
pltscript(plotcbrntl, "Chart.Series[2].Title=\"Xylene\";")
pltscript(plotcbrntl, "Chart.Series[3].Title=\"Nonane\";")

```

```

pltscript(plotcbrntl, "Chart.Series[4].Title=\"Decane\";")
pltscript(plotcbrntl, "Chart.Series[5].Title=\"Naphthalene\";")

pltscript(plotcbrn, "Chart.Header.Text = \"Predictions for OEL Exposure - scaled\";")
pltscript(plotcbrn, "Chart.SubHeader.Text = \"6 Key Hydrocarbons in JP-8\";")
pltscript(plotcbrn, "Chart.SubHeader.Visible=true;")
pltscript(plotcbrn, "Chart.Axes.Left.Automatic=false;")
pltscript(plotcbrn, "Chart.Axes.Left.Minimum=0.0;")
pltscript(plotcbrn, "Chart.Axes.Left.Maximum=0.07;")
pltscript(plotcbrn, "Chart.Axes.Left.Title.Text=\"Remainder of the Brain [mg/L]\";")
pltscript(plotcbrn, "Chart.Axes.Bottom.Title.Text=\"Hours\";")
pltscript(plotcbrn, "Chart.Series[0].Title=\"Toluene\";")
pltscript(plotcbrn, "Chart.Series[1].Title=\"Ethylbenzene\";")
pltscript(plotcbrn, "Chart.Series[2].Title=\"Xylene\";")
pltscript(plotcbrn, "Chart.Series[3].Title=\"Nonane\";")
pltscript(plotcbrn, "Chart.Series[4].Title=\"Decane\";")
pltscript(plotcbrn, "Chart.Series[5].Title=\"Naphthalene\";")

pltscript(plotccoc, "Chart.Header.Text = \"Predictions for OEL Exposure - scaled\";")
pltscript(plotccoc, "Chart.SubHeader.Text = \"6 Key Hydrocarbons in JP-8\";")
pltscript(plotccoc, "Chart.SubHeader.Visible=true;")
pltscript(plotccoc, "Chart.Axes.Left.Automatic=false;")
pltscript(plotccoc, "Chart.Axes.Left.Minimum=0.0;")
pltscript(plotccoc, "Chart.Axes.Left.Maximum=0.07;")
pltscript(plotccoc, "Chart.Axes.Left.Title.Text=\"Cochlea [mg/L]\";")
pltscript(plotccoc, "Chart.Axes.Bottom.Title.Text=\"Hours\";")
pltscript(plotccoc, "Chart.Series[0].Title=\"Toluene\";")
pltscript(plotccoc, "Chart.Series[1].Title=\"Ethylbenzene\";")
pltscript(plotccoc, "Chart.Series[2].Title=\"Xylene\";")
pltscript(plotccoc, "Chart.Series[3].Title=\"Nonane\";")
pltscript(plotccoc, "Chart.Series[4].Title=\"Decane\";")
pltscript(plotccoc, "Chart.Series[5].Title=\"Naphthalene\";")

pltscript(plotcliv, "Chart.Header.Text = \"Predictions for OEL Exposure - scaled\";")
pltscript(plotcliv, "Chart.SubHeader.Text = \"6 Key Hydrocarbons in JP-8\";")
pltscript(plotcliv, "Chart.SubHeader.Visible=true;")
pltscript(plotcliv, "Chart.Axes.Left.Automatic=false;")
pltscript(plotcliv, "Chart.Axes.Left.Minimum=0.0;")
pltscript(plotcliv, "Chart.Axes.Left.Maximum=0.025;")
pltscript(plotcliv, "Chart.Axes.Left.Title.Text=\"Liver [mg/L]\";")
pltscript(plotcliv, "Chart.Axes.Bottom.Title.Text=\"Hours\";")
pltscript(plotcliv, "Chart.Series[0].Title=\"Toluene\";")
pltscript(plotcliv, "Chart.Series[1].Title=\"Ethylbenzene\";")
pltscript(plotcliv, "Chart.Series[2].Title=\"Xylene\";")
pltscript(plotcliv, "Chart.Series[3].Title=\"Nonane\";")
pltscript(plotcliv, "Chart.Series[4].Title=\"Decane\";")
pltscript(plotcliv, "Chart.Series[5].Title=\"Naphthalene\";")

pltscript(plotclng, "Chart.Header.Text = \"Predictions for OEL Exposure - scaled\";")
pltscript(plotclng, "Chart.SubHeader.Text = \"6 Key Hydrocarbons in JP-8\";")
pltscript(plotclng, "Chart.SubHeader.Visible=true;")
pltscript(plotclng, "Chart.Axes.Left.Automatic=false;")
pltscript(plotclng, "Chart.Axes.Left.Minimum=0.0;")
pltscript(plotclng, "Chart.Axes.Left.Maximum=0.025;")
pltscript(plotclng, "Chart.Axes.Left.Title.Text=\"Lung [mg/L]\";")
pltscript(plotclng, "Chart.Axes.Bottom.Title.Text=\"Hours\";")
pltscript(plotclng, "Chart.Series[0].Title=\"Toluene\";")
pltscript(plotclng, "Chart.Series[1].Title=\"Ethylbenzene\";")
pltscript(plotclng, "Chart.Series[2].Title=\"Xylene\";")
pltscript(plotclng, "Chart.Series[3].Title=\"Nonane\";")
pltscript(plotclng, "Chart.Series[4].Title=\"Decane\";")
pltscript(plotclng, "Chart.Series[5].Title=\"Naphthalene\";")

pltscript(plotcven, "Chart.Header.Text = \"Predictions for OEL Exposure - scaled\";")
pltscript(plotcven, "Chart.SubHeader.Text = \"6 Key Hydrocarbons in JP-8\";")
pltscript(plotcven, "Chart.SubHeader.Visible=true;")
pltscript(plotcven, "Chart.Axes.Left.Automatic=false;")
pltscript(plotcven, "Chart.Axes.Left.Minimum=0.0;")
pltscript(plotcven, "Chart.Axes.Left.Maximum=0.025;")
pltscript(plotcven, "Chart.Axes.Left.Title.Text=\"Venous Blood [mg/L]\";")
pltscript(plotcven, "Chart.Axes.Bottom.Title.Text=\"Hours\";")
pltscript(plotcven, "Chart.Series[0].Title=\"Toluene\";")
pltscript(plotcven, "Chart.Series[1].Title=\"Ethylbenzene\";")
pltscript(plotcven, "Chart.Series[2].Title=\"Xylene\";")
pltscript(plotcven, "Chart.Series[3].Title=\"Nonane\";")
pltscript(plotcven, "Chart.Series[4].Title=\"Decane\";")

```

```

    pltscript(plotcven, "Chart.Series[5].Title=\"Naphthalene\";")
set @preference=NoBackslashEscapes

```

## Predict\_RatOEL\_Virent\_50\_50.m

% Simulates 6 key hydrocarbons at OEL concentration for JP-8 and Virent SAK 50:50 blend

```

ResetDoses
Rattus
Rat_6HCs

% Calculates concentration of each component in POSF 4658 and 10326, converted from 200 mg/m3 to ppm, assum-
ing STP
% Weight percent values from tandem gas chromatography analysis by the 2006 Shafer et al. method
% POSF 4658 contains 0.16 percent toluene, 0.11 percent ethylbenzene,
% 0.67 percent xylenes, 1.14 percent nonane, 2.55 percent decane, 0.12% naphthalene
% File name: JPC5 Fuels Comparison-Reanalysis Version.xlsx
% POSF 10326 contains 0.3 % toluene, 0.09% nonane, 0.13% decane, 0.02% naphthalene
% 10326 contains 0.67% C2-benzenes - divided by 4 then assigned 1 part to each component
% ethylbenzene (0.17%), m-, o-, p-xylene (total = 0.05%)
% File name: 10326-Virent SAK -GCxGC w C3-Alkylbenzene speciation.xlsx
% The 50-50 blend averages the concentrations of each component
% Simulates 8 hour work day
BW=0.25; TCHNG=8.0; TSTOP=12.0;
CONC(1)=((0.0023*200.0)*24.45)/MW(1);
CONC(2)=((0.0014*200.0)*24.45)/MW(2);
CONC(3)=((0.0059*200.0)*24.45)/MW(3);
CONC(4)=((0.0062*200.0)*24.45)/MW(4);
CONC(5)=((0.0134*200.0)*24.45)/MW(5);
CONC(6)=((0.0007*200.0)*24.45)/MW(6);
start @nocallback
plotcbrnstm = plot (0, _t, _cbrnstm(:,1), '-b', _t, _cbrnstm(:,2), '-k', _t, _cbrnstm(:,3), '-r', _t,
_cbrnstm(:,4), '-g', _t, _cbrnstm(:,5), '-m', _t, _cbrnstm(:,6), '-c');
plotcbrntl = plot (0, _t, _cbrntl(:,1), '-b', _t, _cbrntl(:,2), '-k', _t, _cbrntl(:,3), '-r', _t,
_cbrntl(:,4), '-g', _t, _cbrntl(:,5), '-m', _t, _cbrntl(:,6), '-c');
plotcbrn = plot (0, _t, _cbrn(:,1), '-b', _t, _cbrn(:,2), '-k', _t, _cbrn(:,3), '-r', _t, _cbrn(:,4), '-g',
_t, _cbrn(:,5), '-m', _t, _cbrn(:,6), '-c');
plotccoc = plot (0, _t, _ccoc(:,1), '-b', _t, _ccoc(:,2), '-k', _t, _ccoc(:,3), '-r', _t, _ccoc(:,4), '-g',
_t, _ccoc(:,5), '-m', _t, _ccoc(:,6), '-c');
plotcliv = plot (0, _t, _cliv(:,1), '-b', _t, _cliv(:,2), '-k', _t, _cliv(:,3), '-r', _t, _cliv(:,4), '-g',
_t, _cliv(:,5), '-m', _t, _cliv(:,6), '-c');
plotclng = plot (0, _t, _clng(:,1), '-b', _t, _clng(:,2), '-k', _t, _clng(:,3), '-r', _t, _clng(:,4), '-g',
_t, _clng(:,5), '-m', _t, _clng(:,6), '-c');
plotcven = plot (0, _t, _cven(:,1), '-b', _t, _cven(:,2), '-k', _t, _cven(:,3), '-r', _t, _cven(:,4), '-g',
_t, _cven(:,5), '-m', _t, _cven(:,6), '-c');

set @preference=BackslashEscapes
pltscript(plotcbrnstm, "Chart.Header.Text = \"Predictions for OEL Exposure - 50-50\";")
pltscript(plotcbrnstm, "Chart.SubHeader.Text = \"6 Key Hydrocarbons in Virent SAK\";")
pltscript(plotcbrnstm, "Chart.SubHeader.Visible=true;")
pltscript(plotcbrnstm, "Chart.Axes.Left.Automatic=false;")
pltscript(plotcbrnstm, "Chart.Axes.Left.Minimum=0.0;")
pltscript(plotcbrnstm, "Chart.Axes.Left.Maximum=0.07;")
pltscript(plotcbrnstm, "Chart.Axes.Left.Title.Text=\"Brain Stem [mg/L]\";")
pltscript(plotcbrnstm, "Chart.Axes.Bottom.Title.Text=\"Hours\";")
pltscript(plotcbrnstm, "Chart.Series[0].Title=\"Toluene\";")
pltscript(plotcbrnstm, "Chart.Series[1].Title=\"Ethylbenzene\";")
pltscript(plotcbrnstm, "Chart.Series[2].Title=\"Xylene\";")
pltscript(plotcbrnstm, "Chart.Series[3].Title=\"Nonane\";")
pltscript(plotcbrnstm, "Chart.Series[4].Title=\"Decane\";")
pltscript(plotcbrnstm, "Chart.Series[5].Title=\"Naphthalene\";")

pltscript(plotcbrntl, "Chart.Header.Text = \"Predictions for OEL Exposure - 50-50\";")
pltscript(plotcbrntl, "Chart.SubHeader.Text = \"6 Key Hydrocarbons in Virent SAK\";")
pltscript(plotcbrntl, "Chart.SubHeader.Visible=true;")
pltscript(plotcbrntl, "Chart.Axes.Left.Automatic=false;")
pltscript(plotcbrntl, "Chart.Axes.Left.Minimum=0.0;")
pltscript(plotcbrntl, "Chart.Axes.Left.Maximum=0.07;")
pltscript(plotcbrntl, "Chart.Axes.Left.Title.Text=\"Temporal Lobe [mg/L]\";")
pltscript(plotcbrntl, "Chart.Axes.Bottom.Title.Text=\"Hours\";")
pltscript(plotcbrntl, "Chart.Series[0].Title=\"Toluene\";")
pltscript(plotcbrntl, "Chart.Series[1].Title=\"Ethylbenzene\";")
pltscript(plotcbrntl, "Chart.Series[2].Title=\"Xylene\";")

```

```

pltscript(plotcbrntl, "Chart.Series[3].Title=\"Nonane\";")
pltscript(plotcbrntl, "Chart.Series[4].Title=\"Decane\";")
pltscript(plotcbrntl, "Chart.Series[5].Title=\"Naphthalene\";")

pltscript(plotcbrn, "Chart.Header.Text = \"Predictions for OEL Exposure - 50-50\";")
pltscript(plotcbrn, "Chart.SubHeader.Text = \"6 Key Hydrocarbons in Virent SAK\";")
pltscript(plotcbrn, "Chart.SubHeader.Visible=true;")
pltscript(plotcbrn, "Chart.Axes.Left.Automatic=false;")
pltscript(plotcbrn, "Chart.Axes.Left.Minimum=0.0;")
pltscript(plotcbrn, "Chart.Axes.Left.Maximum=0.07;")
pltscript(plotcbrn, "Chart.Axes.Left.Title.Text=\"Remainder of the Brain [mg/L]\";")
pltscript(plotcbrn, "Chart.Axes.Bottom.Title.Text=\"Hours\";")
pltscript(plotcbrn, "Chart.Series[0].Title=\"Toluene\";")
pltscript(plotcbrn, "Chart.Series[1].Title=\"Ethylbenzene\";")
pltscript(plotcbrn, "Chart.Series[2].Title=\"Xylene\";")
pltscript(plotcbrn, "Chart.Series[3].Title=\"Nonane\";")
pltscript(plotcbrn, "Chart.Series[4].Title=\"Decane\";")
pltscript(plotcbrn, "Chart.Series[5].Title=\"Naphthalene\";")

pltscript(plotccoc, "Chart.Header.Text = \"Predictions for OEL Exposure - 50-50\";")
pltscript(plotccoc, "Chart.SubHeader.Text = \"6 Key Hydrocarbons in Virent SAK\";")
pltscript(plotccoc, "Chart.SubHeader.Visible=true;")
pltscript(plotccoc, "Chart.Axes.Left.Automatic=false;")
pltscript(plotccoc, "Chart.Axes.Left.Minimum=0.0;")
pltscript(plotccoc, "Chart.Axes.Left.Maximum=0.07;")
pltscript(plotccoc, "Chart.Axes.Left.Title.Text=\"Cochlea [mg/L]\";")
pltscript(plotccoc, "Chart.Axes.Bottom.Title.Text=\"Hours\";")
pltscript(plotccoc, "Chart.Series[0].Title=\"Toluene\";")
pltscript(plotccoc, "Chart.Series[1].Title=\"Ethylbenzene\";")
pltscript(plotccoc, "Chart.Series[2].Title=\"Xylene\";")
pltscript(plotccoc, "Chart.Series[3].Title=\"Nonane\";")
pltscript(plotccoc, "Chart.Series[4].Title=\"Decane\";")
pltscript(plotccoc, "Chart.Series[5].Title=\"Naphthalene\";")

pltscript(plotcliv, "Chart.Header.Text = \"Predictions for OEL Exposure - 50-50\";")
pltscript(plotcliv, "Chart.SubHeader.Text = \"6 Key Hydrocarbons in Virent SAK\";")
pltscript(plotcliv, "Chart.SubHeader.Visible=true;")
pltscript(plotcliv, "Chart.Axes.Left.Automatic=false;")
pltscript(plotcliv, "Chart.Axes.Left.Minimum=0.0;")
pltscript(plotcliv, "Chart.Axes.Left.Maximum=0.025;")
pltscript(plotcliv, "Chart.Axes.Left.Title.Text=\"Liver [mg/L]\";")
pltscript(plotcliv, "Chart.Axes.Bottom.Title.Text=\"Hours\";")
pltscript(plotcliv, "Chart.Series[0].Title=\"Toluene\";")
pltscript(plotcliv, "Chart.Series[1].Title=\"Ethylbenzene\";")
pltscript(plotcliv, "Chart.Series[2].Title=\"Xylene\";")
pltscript(plotcliv, "Chart.Series[3].Title=\"Nonane\";")
pltscript(plotcliv, "Chart.Series[4].Title=\"Decane\";")
pltscript(plotcliv, "Chart.Series[5].Title=\"Naphthalene\";")

pltscript(plotclng, "Chart.Header.Text = \"Predictions for OEL Exposure - 50-50\";")
pltscript(plotclng, "Chart.SubHeader.Text = \"6 Key Hydrocarbons in Virent SAK\";")
pltscript(plotclng, "Chart.SubHeader.Visible=true;")
pltscript(plotclng, "Chart.Axes.Left.Automatic=false;")
pltscript(plotclng, "Chart.Axes.Left.Minimum=0.0;")
pltscript(plotclng, "Chart.Axes.Left.Maximum=0.025;")
pltscript(plotclng, "Chart.Axes.Left.Title.Text=\"Lung [mg/L]\";")
pltscript(plotclng, "Chart.Axes.Bottom.Title.Text=\"Hours\";")
pltscript(plotclng, "Chart.Series[0].Title=\"Toluene\";")
pltscript(plotclng, "Chart.Series[1].Title=\"Ethylbenzene\";")
pltscript(plotclng, "Chart.Series[2].Title=\"Xylene\";")
pltscript(plotclng, "Chart.Series[3].Title=\"Nonane\";")
pltscript(plotclng, "Chart.Series[4].Title=\"Decane\";")
pltscript(plotclng, "Chart.Series[5].Title=\"Naphthalene\";")

pltscript(plotcven, "Chart.Header.Text = \"Predictions for OEL Exposure - 50-50\";")
pltscript(plotcven, "Chart.SubHeader.Text = \"6 Key Hydrocarbons in Virent SAK\";")
pltscript(plotcven, "Chart.SubHeader.Visible=true;")
pltscript(plotcven, "Chart.Axes.Left.Automatic=false;")
pltscript(plotcven, "Chart.Axes.Left.Minimum=0.0;")
pltscript(plotcven, "Chart.Axes.Left.Maximum=0.025;")
pltscript(plotcven, "Chart.Axes.Left.Title.Text=\"Venous Blood [mg/L]\";")
pltscript(plotcven, "Chart.Axes.Bottom.Title.Text=\"Hours\";")
pltscript(plotcven, "Chart.Series[0].Title=\"Toluene\";")
pltscript(plotcven, "Chart.Series[1].Title=\"Ethylbenzene\";")
pltscript(plotcven, "Chart.Series[2].Title=\"Xylene\";")
pltscript(plotcven, "Chart.Series[3].Title=\"Nonane\";")

```



```
    pltscript(plotcven, "Chart.Series[4].Title=\"Decane\";")
    pltscript(plotcven, "Chart.Series[5].Title=\"Naphthalene\";")
set @preference=NoBackslashEscapes
```
